# Supplementary material for: Electrochemical CO2reduction towards formic acid and methanol on transition metal oxide surfaces as a function of CO coverage
Source: Royal Society of Chemistry journal article supplement (doi:10.1039/d2cy02175g), 2023-01-01
Supplement: d2cy02175g1.pdf [file d2cy02175g1.pdf]

## Supporting information

### Electrochemical CO<sub>2</sub> Reduction Reaction on Metal Oxide Surfaces as a function of CO Coverage

Narges Atrak<sup>1</sup>, Ebrahim Tayyebi<sup>1</sup> & Egill Skúlason<sup>1,\*</sup>

<sup>(1)</sup> Science Institute & Faculty of Industrial Engineering, Mechanical Engineering and Computer Science, University of Iceland, VR-III, 107 Reykjavík, Iceland

\* corresponding author: [egillsk@hi.is](mailto:egillsk@hi.is)

Table S1. Relative energy of CO molecules on different TMOs for 50% and 75% CO coverage with respect to lowest energy configuration for different CO configurations. The lowest energy configurations are indicated with green colored boxes in the table. The candidates desorbing the CO from their surfaces are shown with term “des.” in the table. NbO<sub>2</sub> with pink color data is explained in the main text.

| Catalysts        | Energy/eV       |         |         |         |                 |           |
|------------------|-----------------|---------|---------|---------|-----------------|-----------|
|                  | 50% CO coverage |         |         |         | 75% CO coverage |           |
|                  | br-br           | CUS-CUS | br-nCUS | br-fCUS | br-CUS-CUS      | br-br-CUS |
| HfO <sub>2</sub> | 0.79            | 2.15    | 0.00    | 0.33    | 0.48            | 0.00      |
| MoO <sub>2</sub> | 0.07            | 1.08    | 0.00    | 0.43    | 0.40            | 0.00      |
| OsO <sub>2</sub> | 0.88            | 0.10    | 0.00    | 0.06    | 0.21            | 0.00      |
| NbO <sub>2</sub> | -0.54           | 1.75    | 0.00    | 0.20    | 0.48            | 0.00      |
| TiO <sub>2</sub> | 0.00            | 1.93    | 0.61    | 0.62    | 0.78            | 0.00      |
| IrO <sub>2</sub> | 0.49            | 0.00    | 0.10    | 0.20    | 0.00            | 0.18      |
| RuO <sub>2</sub> | 0.12            | 0.39    | 0.00    | 0.18    | 0.22            | 0.00      |
| CrO <sub>2</sub> | 0.00            | 0.57    | 0.25    | 0.30    | 0.57            | 0.00      |
| PtO <sub>2</sub> | 0.00            | 1.84    | 0.61    | 0.60    | 0.95            | 0.00      |
| RhO <sub>2</sub> | 0.19            | 0.10    | 0.00    | 0.05    | 0.14            | 0.00      |
| MnO <sub>2</sub> | 0.00            | des     | des     | des     | des             | des       |
| PdO <sub>2</sub> | 0.00            | 1.47    | 0.70    | 0.76    | 0.85            | 0.00      |

Table S2. Zero-point energy, entropy, and specific heat capacity corrections.

| Adsorbate                | ZPE  | TS   | CPdt |
|--------------------------|------|------|------|
| CO <sub>2</sub> (g)      | 0.31 | 0.65 | 0.10 |
| CO(g)                    | 0.14 | 0.67 | 0.09 |
| H <sub>2</sub> (g)       | 0.27 | 0.42 | 0.09 |
| H <sub>2</sub> O(l)      | 0.58 | 0.65 | 0.10 |
| CH <sub>3</sub> OH(aq)   | 1.35 | 0.79 | 0.11 |
| HCOOH(g)                 | 0.90 | 1.02 | 0.11 |
| OH*                      | 0.40 | 0.04 | 0.03 |
| O*                       | 0.08 | 0.03 | 0.02 |
| CO*                      | 0.22 | 0.08 | 0.05 |
| OCHO*                    | 0.63 | 0.20 | 0.10 |
| COOH*                    | 0.63 | 0.17 | 0.09 |
| HCOOH*                   | 0.92 | 0.22 | 0.09 |
| H <sub>2</sub> COOH*     | 1.25 | 0.25 | 0.11 |
| CH <sub>3</sub> OH*      | 1.51 | 0.18 | 0.08 |
| CHO*                     | 0.48 | 0.18 | 0.07 |
| COH*                     | 0.52 | 0.15 | 0.06 |
| CH <sub>2</sub> O*       | 0.82 | 0.12 | 0.07 |
| CH <sub>3</sub> O*       | 1.15 | 0.14 | 0.08 |
| H*                       | 0.20 | 0.00 | 0.00 |
| CO <sub>2</sub> *        | 0.33 | 0.17 | 0.09 |
| OCO*                     | 0.29 | 0.17 | 0.09 |
| CO <sub>2</sub> *-linear | 0.33 | 0.23 | 0.11 |

Table S3. Electronic and binding free energy for all the intermediates with a) 0% CO coverage and b) 25%, 50% and 75% CO coverages on all TMOs studied in this work.

a) 0% CO coverage

| TMOs             | CO <sub>2</sub> (g)→COOH |       | CO <sub>2</sub> (g)→OCHO |       | OCHO→HCOOH(aq) |       | OCHO→HCOOH |       | H <sub>2</sub> (g)→H |       |
|------------------|--------------------------|-------|--------------------------|-------|----------------|-------|------------|-------|----------------------|-------|
|                  | ΔE                       | ΔG    | ΔE                       | ΔG    | ΔE             | ΔG    | ΔE         | ΔG    | ΔE                   | ΔG    |
| HfO <sub>2</sub> | -3.20                    | -2.73 | -4.73                    | -4.28 | 4.81           | 4.21  | 1.23       | 1.47  | -1.44                | -1.26 |
| MoO <sub>2</sub> | -1.49                    | -1.02 | -2.57                    | -2.12 | 2.65           | 2.05  | 1.47       | 1.71  | -0.69                | -0.51 |
| OsO <sub>2</sub> | -1.59                    | -1.12 | -2.23                    | -1.78 | 2.31           | 1.71  | 0.89       | 1.13  | -1.11                | -0.93 |
| NbO <sub>2</sub> | -1.69                    | -1.22 | -2.22                    | -1.77 | 2.30           | 1.70  | 1.03       | 1.27  | -1.31                | -1.13 |
| TiO <sub>2</sub> | -0.73                    | -0.26 | -1.96                    | -1.51 | 2.04           | 1.44  | 0.21       | 0.45  | -0.51                | -0.33 |
| IrO <sub>2</sub> | -1.46                    | -0.99 | -1.78                    | -1.33 | 1.86           | 1.26  | 0.78       | 1.02  | -0.90                | -0.72 |
| RuO <sub>2</sub> | -0.46                    | 0.01  | -1.30                    | -0.85 | 1.38           | 0.78  | 0.46       | 0.70  | -0.60                | -0.42 |
| CrO <sub>2</sub> | 0.53                     | 1.00  | -0.73                    | -0.28 | 0.81           | 0.21  | 0.30       | 0.54  | 0.17                 | 0.35  |
| PtO <sub>2</sub> | -0.95                    | -0.48 | -0.76                    | -0.31 | 0.84           | 0.24  | 0.00       | 0.24  | -0.53                | -0.35 |
| RhO <sub>2</sub> | -0.06                    | 0.41  | -0.71                    | -0.26 | 0.79           | 0.19  | -0.06      | 0.18  | -0.17                | 0.01  |
| MnO <sub>2</sub> | 0.65                     | 1.12  | -0.10                    | 0.35  | 0.18           | -0.42 | -0.48      | -0.24 | 0.60                 | 0.78  |
| PdO <sub>2</sub> | 0.16                     | 0.63  | 0.15                     | 0.60  | -0.07          | -0.67 | -0.54      | -0.30 | 0.11                 | 0.29  |

b) 25%, 50% and 75% CO coverages

| HfO <sub>2</sub>                                                                                      |       |       |       |       |        |       |         |       |    |    |
|-------------------------------------------------------------------------------------------------------|-------|-------|-------|-------|--------|-------|---------|-------|----|----|
| Intermediates                                                                                         | 25%   |       | 50%   |       | 75%-br |       | 75%-CUS |       |    |    |
|                                                                                                       | ΔE    | ΔG    | ΔE    | ΔG    | ΔE     | ΔG    | ΔE      | ΔG    | ΔE | ΔG |
| CO <sub>2</sub> (g) + * + (H <sup>+</sup> + e <sup>-</sup> ) → OCHO                                   | -2.93 | -2.48 | -2.73 | -2.28 | -1.97  | -1.54 | -1.64   | -1.21 |    |    |
| OCHO + (H <sup>+</sup> + e <sup>-</sup> ) → HCOOH(aq) + *                                             | 3.01  | 2.41  | 2.82  | 2.22  | 2.05   | 1.47  | 1.72    | 1.14  |    |    |
| OCHO + (H <sup>+</sup> + e <sup>-</sup> ) → HCOOH                                                     | 1.26  | 1.50  | -0.73 | -0.49 | 0.41   | 0.67  | 0.54    | 0.80  |    |    |
| HCOOH + (H <sup>+</sup> + e <sup>-</sup> ) → H <sub>2</sub> COOH                                      | -1.18 | -0.88 | 0.78  | 1.08  | -0.72  | -0.42 | -0.67   | -0.37 |    |    |
| H <sub>2</sub> COOH + (H <sup>+</sup> + e <sup>-</sup> ) → CH <sub>3</sub> OH(aq) + O                 | -0.21 | -0.60 | -0.21 | -0.60 | ---    | ---   | ---     | ---   |    |    |
| H <sub>2</sub> COOH + (H <sup>+</sup> + e <sup>-</sup> ) → H <sub>2</sub> CO + H <sub>2</sub> O(l)    | 0.61  | 0.28  | 0.73  | 0.40  | -0.06  | -0.38 | 1.10    | 0.77  |    |    |
| H <sub>2</sub> COOH + (H <sup>+</sup> + e <sup>-</sup> ) → H <sub>3</sub> CO + OH                     | -1.79 | -1.43 | -1.59 | -1.24 | ---    | ---   | ---     | ---   |    |    |
| O + (H <sup>+</sup> + e <sup>-</sup> ) → OH                                                           | 0.04  | 0.34  | 0.07  | 0.37  | ---    | ---   | ---     | ---   |    |    |
| H <sub>2</sub> CO + (H <sup>+</sup> + e <sup>-</sup> ) → H <sub>3</sub> CO                            | -0.69 | -0.39 | -0.87 | -0.57 | -0.42  | -0.12 | -1.70   | -1.40 |    |    |
| H <sub>3</sub> CO + OH + (H <sup>+</sup> + e <sup>-</sup> ) → H <sub>3</sub> CO + H <sub>2</sub> O(l) | 1.70  | 1.32  | 1.45  | 1.07  | ---    | ---   | ---     | ---   |    |    |
| H <sub>3</sub> CO + OH + (H <sup>+</sup> + e <sup>-</sup> ) → CH <sub>3</sub> OH(aq) + OH             | 1.62  | 1.18  | 1.45  | 1.01  | ---    | ---   | ---     | ---   |    |    |
| OH + (H <sup>+</sup> + e <sup>-</sup> ) → H <sub>2</sub> O(l) + *                                     | 2.32  | 1.94  | 2.13  | 1.75  | ---    | ---   | ---     | ---   |    |    |
| H <sub>3</sub> CO + (H <sup>+</sup> + e <sup>-</sup> ) → H <sub>3</sub> COH(aq) + *                   | 2.24  | 1.80  | 2.13  | 1.69  | 2.07   | 1.57  | 1.68    | 1.18  |    |    |
| O + OH + (H <sup>+</sup> + e <sup>-</sup> ) → O + H <sub>2</sub> O(l)                                 | 0.95  | 0.57  | 1.74  | 1.36  | ---    | ---   | ---     | ---   |    |    |
| H <sub>2</sub> + * → H + (H <sup>+</sup> + e <sup>-</sup> )                                           | -0.94 | -0.76 | -0.72 | -0.54 | -0.77  | -0.59 | 0.15    | 0.33  |    |    |
| MoO <sub>2</sub>                                                                                      |       |       |       |       |        |       |         |       |    |    |

| Intermediates                                                                                                                | 25%        |            | 50%        |            | 75%-br     |            | 75%-CUS    |            |
|------------------------------------------------------------------------------------------------------------------------------|------------|------------|------------|------------|------------|------------|------------|------------|
|                                                                                                                              | $\Delta E$ | $\Delta G$ |
| $\text{CO}_2(\text{g}) + * + (\text{H}^+ + \text{e}^-) \rightarrow \text{OCHO}$                                              | -2.41      | -1.96      | -1.93      | -1.48      | -1.52      | -1.09      | -0.67      | -0.67      |
| $\text{OCHO} + (\text{H}^+ + \text{e}^-) \rightarrow \text{HCOOH}(\text{aq}) + *$                                            | 2.50       | 1.90       | 2.01       | 1.41       | 1.60       | 1.02       | 0.75       | 0.75       |
| $\text{OCHO} + (\text{H}^+ + \text{e}^-) \rightarrow \text{HCOOH}$                                                           | 1.25       | 1.49       | 0.05       | 0.29       | -0.46      | -0.20      | ---        | ---        |
| $\text{HCOOH} + (\text{H}^+ + \text{e}^-) \rightarrow \text{H}_2\text{COOH}$                                                 | -1.32      | -1.02      | -0.53      | -0.23      | 0.23       | 0.53       | ---        | ---        |
| $\text{H}_2\text{COOH} + (\text{H}^+ + \text{e}^-) \rightarrow \text{CH}_3\text{OH}(\text{aq}) + \text{O}$                   | 0.07       | -0.31      | 0.54       | 0.15       | -0.36      | -0.74      | ---        | ---        |
| $\text{H}_2\text{COOH} + (\text{H}^+ + \text{e}^-) \rightarrow \text{H}_2\text{CO} + \text{H}_2\text{O}(\text{l})$           | 0.68       | 0.35       | 1.17       | 0.84       | 0.00       | -0.33      | ---        | ---        |
| $\text{H}_2\text{COOH} + (\text{H}^+ + \text{e}^-) \rightarrow \text{H}_3\text{CO} + \text{OH}$                              | -1.05      | -0.70      | -0.58      | -0.22      | ---        | ---        | ---        | ---        |
| $\text{O} + (\text{H}^+ + \text{e}^-) \rightarrow \text{OH}$                                                                 | -0.17      | 0.13       | -0.06      | 0.24       | -0.23      | 0.07       | ---        | ---        |
| $\text{H}_2\text{CO} + (\text{H}^+ + \text{e}^-) \rightarrow \text{H}_3\text{CO}$                                            | -0.83      | -0.53      | -1.09      | -0.79      | -0.64      | -0.34      | ---        | ---        |
| $\text{H}_3\text{CO} + \text{OH} + (\text{H}^+ + \text{e}^-) \rightarrow \text{H}_3\text{CO} + \text{H}_2\text{O}(\text{l})$ | 0.90       | 0.52       | 0.66       | 0.28       | ---        | ---        | ---        | ---        |
| $\text{H}_3\text{CO} + \text{OH} + (\text{H}^+ + \text{e}^-) \rightarrow \text{CH}_3\text{OH}(\text{aq}) + \text{OH}$        | 0.95       | 0.51       | 1.05       | 0.61       | ---        | ---        | ---        | ---        |
| $\text{OH} + (\text{H}^+ + \text{e}^-) \rightarrow \text{H}_2\text{O}(\text{l}) + *$                                         | 1.90       | 1.52       | 1.24       | 0.86       | ---        | ---        | ---        | ---        |
| $\text{H}_3\text{CO} + (\text{H}^+ + \text{e}^-) \rightarrow \text{H}_3\text{COH}(\text{aq}) + *$                            | 1.95       | 1.51       | 1.64       | 1.20       | 1.69       | 1.19       | ---        | ---        |
| $\text{O} + \text{OH} + (\text{H}^+ + \text{e}^-) \rightarrow \text{O} + \text{H}_2\text{O}(\text{l})$                       | 0.29       | 0.47       | 0.80       | 0.42       | ---        | ---        | ---        | ---        |
| $\text{H}_2 + * \rightarrow \text{H} + (\text{H}^+ + \text{e}^-)$                                                            | -0.59      | -0.41      | 0.35       | 0.53       | 0.25       | 0.43       | 0.32       | 0.50       |
| <b>OsO<sub>2</sub></b>                                                                                                       |            |            |            |            |            |            |            |            |
| Intermediates                                                                                                                | 25%        |            | 50%        |            | 75%-br     |            | 75%-CUS    |            |
|                                                                                                                              | $\Delta E$ | $\Delta G$ |
| $\text{CO}_2(\text{g}) + * + (\text{H}^+ + \text{e}^-) \rightarrow \text{OCHO}$                                              | -2.39      | -1.94      | -2.14      | -1.69      | -1.47      | -1.04      | -0.42      | 0.01       |
| $\text{OCHO} + (\text{H}^+ + \text{e}^-) \rightarrow \text{HCOOH}(\text{aq}) + *$                                            | 2.46       | 1.86       | 2.22       | 1.62       | 1.56       | 0.98       | 0.51       | -0.07      |
| $\text{OCHO} + (\text{H}^+ + \text{e}^-) \rightarrow \text{HCOOH}$                                                           | 0.96       | 1.20       | 0.59       | 0.83       | -0.15      | 0.11       | ---        | ---        |
| $\text{HCOOH} + (\text{H}^+ + \text{e}^-) \rightarrow \text{H}_2\text{COOH}$                                                 | -1.18      | -0.88      | -1.00      | -0.70      | -0.17      | 0.12       | ---        | ---        |
| $\text{H}_2\text{COOH} + (\text{H}^+ + \text{e}^-) \rightarrow \text{CH}_3\text{OH}(\text{aq}) + \text{O}$                   | 0.93       | 0.54       | 1.04       | 0.65       | 0.46       | 0.07       | ---        | ---        |
| $\text{H}_2\text{COOH} + (\text{H}^+ + \text{e}^-) \rightarrow \text{H}_2\text{CO} + \text{H}_2\text{O}(\text{l})$           | 0.44       | 0.11       | 0.71       | 0.38       | 0.54       | 0.21       | ---        | ---        |
| $\text{H}_2\text{COOH} + (\text{H}^+ + \text{e}^-) \rightarrow \text{H}_3\text{CO} + \text{OH}$                              | -0.96      | -0.61      | -0.76      | -0.40      | ---        | ---        | ---        | ---        |
| $\text{O} + (\text{H}^+ + \text{e}^-) \rightarrow \text{OH}$                                                                 | -0.84      | -0.54      | -0.93      | -0.63      | -1.10      | -0.80      | ---        | ---        |
| $\text{H}_2\text{CO} + (\text{H}^+ + \text{e}^-) \rightarrow \text{H}_3\text{CO}$                                            | -0.45      | -0.15      | -0.80      | -0.50      | -1.30      | -1.00      | ---        | ---        |
| $\text{H}_3\text{CO} + \text{OH} + (\text{H}^+ + \text{e}^-) \rightarrow \text{H}_3\text{CO} + \text{H}_2\text{O}(\text{l})$ | 0.95       | 0.57       | 0.67       | 0.29       | ---        | ---        | ---        | ---        |
| $\text{H}_3\text{CO} + \text{OH} + (\text{H}^+ + \text{e}^-) \rightarrow \text{CH}_3\text{OH}(\text{aq}) + \text{OH}$        | 1.05       | 0.61       | 0.86       | 0.42       | ---        | ---        | ---        | ---        |
| $\text{OH} + (\text{H}^+ + \text{e}^-) \rightarrow \text{H}_2\text{O}(\text{l}) + *$                                         | 1.83       | 1.45       | 1.75       | 1.37       | ---        | ---        | ---        | ---        |
| $\text{H}_3\text{CO} + (\text{H}^+ + \text{e}^-) \rightarrow \text{H}_3\text{COH}(\text{aq}) + *$                            | 1.93       | 1.49       | 1.95       | 1.51       | 1.86       | 1.36       | ---        | ---        |
| $\text{O} + \text{OH} + (\text{H}^+ + \text{e}^-) \rightarrow \text{O} + \text{H}_2\text{O}(\text{l})$                       | 0.91       | 0.53       | 0.78       | 0.40       | ---        | ---        | ---        | ---        |
| $\text{H}_2 + * \rightarrow \text{H} + (\text{H}^+ + \text{e}^-)$                                                            | -1.15      | -0.97      | -1.14      | -0.96      | -1.05      | -0.87      | -0.26      | -0.08      |
| <b>NbO<sub>2</sub></b>                                                                                                       |            |            |            |            |            |            |            |            |

| Intermediates                                                                                                                | 25%        |            | 50%        |            | 75%-br     |            | 75%-CUS    |            |
|------------------------------------------------------------------------------------------------------------------------------|------------|------------|------------|------------|------------|------------|------------|------------|
|                                                                                                                              | $\Delta E$ | $\Delta G$ |
| $\text{CO}_2(\text{g}) + * + (\text{H}^+ + \text{e}^-) \rightarrow \text{OCHO}$                                              | -1.65      | -1.20      | -1.69      | -1.24      | -1.48      | -1.05      | -0.82      | -0.39      |
| $\text{OCHO} + (\text{H}^+ + \text{e}^-) \rightarrow \text{HCOOH}(\text{aq}) + *$                                            | 1.73       | 1.13       | 1.77       | 1.17       | 1.56       | 0.98       | 0.90       | 0.32       |
| $\text{OCHO} + (\text{H}^+ + \text{e}^-) \rightarrow \text{HCOOH}$                                                           | 0.18       | 0.42       | 1.03       | 1.27       | 0.67       | 0.93       | ---        | ---        |
| $\text{HCOOH} + (\text{H}^+ + \text{e}^-) \rightarrow \text{H}_2\text{COOH}$                                                 | -0.39      | -0.09      | -1.14      | -0.84      | -1.01      | -0.72      | ---        | ---        |
| $\text{H}_2\text{COOH} + (\text{H}^+ + \text{e}^-) \rightarrow \text{CH}_3\text{OH}(\text{aq}) + \text{O}$                   | -0.52      | -0.91      | -0.57      | -0.96      | -0.47      | -0.86      | ---        | ---        |
| $\text{H}_2\text{COOH} + (\text{H}^+ + \text{e}^-) \rightarrow \text{H}_2\text{CO} + \text{H}_2\text{O}(\text{l})$           | 0.43       | 0.10       | 0.58       | 0.25       | 0.28       | -0.05      | ---        | ---        |
| $\text{H}_2\text{COOH} + (\text{H}^+ + \text{e}^-) \rightarrow \text{H}_3\text{CO} + \text{OH}$                              | -1.56      | -1.21      | -1.57      | -1.22      | ---        | ---        | ---        | ---        |
| $\text{O} + (\text{H}^+ + \text{e}^-) \rightarrow \text{OH}$                                                                 | 0.00       | 0.30       | 0.02       | 0.32       | -0.21      | 0.09       | ---        | ---        |
| $\text{H}_2\text{CO} + (\text{H}^+ + \text{e}^-) \rightarrow \text{H}_3\text{CO}$                                            | -1.01      | -0.71      | -1.20      | -0.90      | -0.98      | -0.68      | ---        | ---        |
| $\text{H}_3\text{CO} + \text{OH} + (\text{H}^+ + \text{e}^-) \rightarrow \text{H}_3\text{CO} + \text{H}_2\text{O}(\text{l})$ | 0.98       | 0.60       | 0.95       | 0.57       | ---        | ---        | ---        | ---        |
| $\text{H}_3\text{CO} + \text{OH} + (\text{H}^+ + \text{e}^-) \rightarrow \text{CH}_3\text{OH}(\text{aq}) + \text{OH}$        | 1.05       | 0.61       | 1.03       | 0.59       | ---        | ---        | ---        | ---        |
| $\text{OH} + (\text{H}^+ + \text{e}^-) \rightarrow \text{H}_2\text{O}(\text{l}) + *$                                         | 1.68       | 1.30       | 1.65       | 1.27       | ---        | ---        | ---        | ---        |
| $\text{H}_3\text{CO} + (\text{H}^+ + \text{e}^-) \rightarrow \text{H}_3\text{COH}(\text{aq}) + *$                            | 1.74       | 1.30       | 1.72       | 1.28       | 1.84       | 1.34       | ---        | ---        |
| $\text{O} + \text{OH} + (\text{H}^+ + \text{e}^-) \rightarrow \text{O} + \text{H}_2\text{O}(\text{l})$                       | 1.12       | 0.74       | 1.10       | 0.72       | ---        | ---        | ---        | ---        |
| $\text{H}_2 + * \rightarrow \text{H} + (\text{H}^+ + \text{e}^-)$                                                            | -1.02      | -0.84      | -1.02      | -0.84      | -0.99      | -0.81      | 0.56       | 0.74       |
| <b>TiO<sub>2</sub></b>                                                                                                       |            |            |            |            |            |            |            |            |
| Intermediates                                                                                                                | 25%        |            | 50%        |            | 75%-br     |            | 75%-CUS    |            |
|                                                                                                                              | $\Delta E$ | $\Delta G$ |
| $\text{CO}_2(\text{g}) + * + (\text{H}^+ + \text{e}^-) \rightarrow \text{OCHO}$                                              | -1.51      | -1.06      | -1.31      | -0.86      | ---        | ---        | -0.33      | 0.10       |
| $\text{OCHO} + (\text{H}^+ + \text{e}^-) \rightarrow \text{HCOOH}(\text{aq}) + *$                                            | 1.59       | 0.99       | 1.39       | 0.79       | ---        | ---        | 0.41       | -0.17      |
| $\text{OCHO} + (\text{H}^+ + \text{e}^-) \rightarrow \text{HCOOH}$                                                           | 0.70       | 0.94       | 0.83       | 1.07       | ---        | ---        | ---        | ---        |
| $\text{HCOOH} + (\text{H}^+ + \text{e}^-) \rightarrow \text{H}_2\text{COOH}$                                                 | -0.70      | -0.40      | -0.62      | -0.32      | ---        | ---        | ---        | ---        |
| $\text{H}_2\text{COOH} + (\text{H}^+ + \text{e}^-) \rightarrow \text{CH}_3\text{OH}(\text{aq}) + \text{O}$                   | -0.33      | -0.72      | 0.23       | -0.16      | ---        | ---        | ---        | ---        |
| $\text{H}_2\text{COOH} + (\text{H}^+ + \text{e}^-) \rightarrow \text{H}_2\text{CO} + \text{H}_2\text{O}(\text{l})$           | 0.78       | 0.45       | 0.99       | 0.66       | ---        | ---        | ---        | ---        |
| $\text{H}_2\text{COOH} + (\text{H}^+ + \text{e}^-) \rightarrow \text{H}_3\text{CO} + \text{OH}$                              | -1.13      | -0.78      | -0.40      | -0.05      | ---        | ---        | ---        | ---        |
| $\text{O} + (\text{H}^+ + \text{e}^-) \rightarrow \text{OH}$                                                                 | -0.17      | 0.13       | -0.34      | -0.04      | ---        | ---        | ---        | ---        |
| $\text{H}_2\text{CO} + (\text{H}^+ + \text{e}^-) \rightarrow \text{H}_3\text{CO}$                                            | -1.35      | -1.05      | -1.35      | -1.05      | ---        | ---        | ---        | ---        |
| $\text{H}_3\text{CO} + \text{OH} + (\text{H}^+ + \text{e}^-) \rightarrow \text{H}_3\text{CO} + \text{H}_2\text{O}(\text{l})$ | 0.56       | 0.18       | 0.04       | -0.34      | ---        | ---        | ---        | ---        |
| $\text{H}_3\text{CO} + \text{OH} + (\text{H}^+ + \text{e}^-) \rightarrow \text{CH}_3\text{OH}(\text{aq}) + \text{OH}$        | 0.63       | 0.19       | 0.29       | -0.15      | ---        | ---        | ---        | ---        |
| $\text{OH} + (\text{H}^+ + \text{e}^-) \rightarrow \text{H}_2\text{O}(\text{l}) + *$                                         | 1.32       | 0.94       | 0.52       | 0.14       | ---        | ---        | ---        | ---        |
| $\text{H}_3\text{CO} + (\text{H}^+ + \text{e}^-) \rightarrow \text{H}_3\text{COH}(\text{aq}) + *$                            | 1.39       | 0.95       | 0.77       | 0.33       | ---        | ---        | ---        | ---        |
| $\text{O} + \text{OH} + (\text{H}^+ + \text{e}^-) \rightarrow \text{O} + \text{H}_2\text{O}(\text{l})$                       | 0.76       | 0.38       | -0.45      | -0.83      | ---        | ---        | ---        | ---        |
| $\text{H}_2 + * \rightarrow \text{H} + (\text{H}^+ + \text{e}^-)$                                                            | 0.01       | 0.19       | 0.82       | 1.00       | -0.01      | 0.17       | 0.75       | 0.93       |
| <b>IrO<sub>2</sub></b>                                                                                                       |            |            |            |            |            |            |            |            |

| Intermediates                                                                                                                | 25%        |            | 50%        |            | 75%-br     |            | 75%-CUS    |            |
|------------------------------------------------------------------------------------------------------------------------------|------------|------------|------------|------------|------------|------------|------------|------------|
|                                                                                                                              | $\Delta E$ | $\Delta G$ |
| $\text{CO}_2(\text{g}) + * + (\text{H}^+ + \text{e}^-) \rightarrow \text{OCHO}$                                              | -1.77      | -1.32      | -1.66      | -1.21      | -1.23      | -0.80      | -0.60      | -0.17      |
| $\text{OCHO} + (\text{H}^+ + \text{e}^-) \rightarrow \text{HCOOH}(\text{aq}) + *$                                            | 1.85       | 1.25       | 1.75       | 1.15       | 1.31       | 0.73       | 0.68       | 0.10       |
| $\text{OCHO} + (\text{H}^+ + \text{e}^-) \rightarrow \text{HCOOH}$                                                           | 0.91       | 1.15       | 0.02       | 0.34       | -0.55      | -0.29      | ---        | ---        |
| $\text{HCOOH} + (\text{H}^+ + \text{e}^-) \rightarrow \text{H}_2\text{COOH}$                                                 | -0.89      | -0.59      | -0.44      | -0.22      | 0.14       | 0.44       | ---        | ---        |
| $\text{H}_2\text{COOH} + (\text{H}^+ + \text{e}^-) \rightarrow \text{CH}_3\text{OH}(\text{aq}) + \text{O}$                   | 1.12       | 0.73       | 1.11       | 0.73       | 0.44       | 0.05       | ---        | ---        |
| $\text{H}_2\text{COOH} + (\text{H}^+ + \text{e}^-) \rightarrow \text{H}_2\text{CO} + \text{H}_2\text{O}(\text{l})$           | 0.25       | -0.08      | 0.43       | 0.10       | 0.60       | 0.27       | ---        | ---        |
| $\text{H}_2\text{COOH} + (\text{H}^+ + \text{e}^-) \rightarrow \text{H}_3\text{CO} + \text{OH}$                              | -0.60      | -0.25      | -0.62      | -0.27      | ---        | ---        | ---        | ---        |
| $\text{O} + (\text{H}^+ + \text{e}^-) \rightarrow \text{OH}$                                                                 | -1.44      | -1.14      | -1.08      | -0.78      | -0.94      | -0.64      | ---        | ---        |
| $\text{H}_2\text{CO} + (\text{H}^+ + \text{e}^-) \rightarrow \text{H}_3\text{CO}$                                            | -0.37      | -0.07      | -0.57      | -0.27      | -1.25      | -0.95      | ---        | ---        |
| $\text{H}_3\text{CO} + \text{OH} + (\text{H}^+ + \text{e}^-) \rightarrow \text{H}_3\text{CO} + \text{H}_2\text{O}(\text{l})$ | 0.48       | 0.10       | 0.48       | 0.10       | ---        | ---        | ---        | ---        |
| $\text{H}_3\text{CO} + \text{OH} + (\text{H}^+ + \text{e}^-) \rightarrow \text{CH}_3\text{OH}(\text{aq}) + \text{OH}$        | 0.27       | -0.17      | 0.65       | 0.21       | ---        | ---        | ---        | ---        |
| $\text{OH} + (\text{H}^+ + \text{e}^-) \rightarrow \text{H}_2\text{O}(\text{l}) + *$                                         | 1.38       | 1.00       | 1.36       | 0.98       | ---        | ---        | ---        | ---        |
| $\text{H}_3\text{CO} + (\text{H}^+ + \text{e}^-) \rightarrow \text{H}_3\text{COH}(\text{aq}) + *$                            | 1.18       | 0.74       | 1.53       | 1.09       | 1.59       | 1.09       | ---        | ---        |
| $\text{O} + \text{OH} + (\text{H}^+ + \text{e}^-) \rightarrow \text{O} + \text{H}_2\text{O}(\text{l})$                       | 0.05       | -0.33      | 0.40       | 0.02       | ---        | ---        | ---        | ---        |
| $\text{H}_2 + * \rightarrow \text{H} + (\text{H}^+ + \text{e}^-)$                                                            | -0.88      | -0.70      | -0.88      | -0.70      | -0.93      | -0.75      | -0.69      | -0.51      |
| <b>RuO<sub>2</sub></b>                                                                                                       |            |            |            |            |            |            |            |            |
| Intermediates                                                                                                                | 25%        |            | 50%        |            | 75%-br     |            | 75%-CUS    |            |
|                                                                                                                              | $\Delta E$ | $\Delta G$ |
| $\text{CO}_2(\text{g}) + * + (\text{H}^+ + \text{e}^-) \rightarrow \text{OCHO}$                                              | -1.50      | -1.05      | -1.19      | -0.74      | -0.71      | -0.28      | 0.19       | 0.62       |
| $\text{OCHO} + (\text{H}^+ + \text{e}^-) \rightarrow \text{HCOOH}(\text{aq}) + *$                                            | 1.58       | 0.98       | 1.27       | 0.67       | 0.80       | 0.22       | -0.11      | -0.69      |
| $\text{OCHO} + (\text{H}^+ + \text{e}^-) \rightarrow \text{HCOOH}$                                                           | 0.56       | 0.80       | 0.23       | 0.47       | ---        | ---        | ---        | ---        |
| $\text{HCOOH} + (\text{H}^+ + \text{e}^-) \rightarrow \text{H}_2\text{COOH}$                                                 | -0.64      | -0.34      | -0.39      | -0.09      | ---        | ---        | ---        | ---        |
| $\text{H}_2\text{COOH} + (\text{H}^+ + \text{e}^-) \rightarrow \text{CH}_3\text{OH}(\text{aq}) + \text{O}$                   | 1.27       | 0.88       | 1.28       | 0.90       | ---        | ---        | ---        | ---        |
| $\text{H}_2\text{COOH} + (\text{H}^+ + \text{e}^-) \rightarrow \text{H}_2\text{CO} + \text{H}_2\text{O}(\text{l})$           | 0.69       | 0.37       | 0.81       | 0.48       | ---        | ---        | ---        | ---        |
| $\text{H}_2\text{COOH} + (\text{H}^+ + \text{e}^-) \rightarrow \text{H}_3\text{CO} + \text{OH}$                              | -0.17      | 0.19       | 0.01       | 0.36       | ---        | ---        | ---        | ---        |
| $\text{O} + (\text{H}^+ + \text{e}^-) \rightarrow \text{OH}$                                                                 | -1.32      | -1.02      | -1.40      | -1.10      | ---        | ---        | ---        | ---        |
| $\text{H}_2\text{CO} + (\text{H}^+ + \text{e}^-) \rightarrow \text{H}_3\text{CO}$                                            | -0.82      | -0.52      | -1.04      | -0.74      | ---        | ---        | ---        | ---        |
| $\text{H}_3\text{CO} + \text{OH} + (\text{H}^+ + \text{e}^-) \rightarrow \text{H}_3\text{CO} + \text{H}_2\text{O}(\text{l})$ | 0.04       | -0.34      | -0.24      | -0.62      | ---        | ---        | ---        | ---        |
| $\text{H}_3\text{CO} + \text{OH} + (\text{H}^+ + \text{e}^-) \rightarrow \text{CH}_3\text{OH}(\text{aq}) + \text{OH}$        | 0.12       | -0.32      | -0.12      | -0.56      | ---        | ---        | ---        | ---        |
| $\text{OH} + (\text{H}^+ + \text{e}^-) \rightarrow \text{H}_2\text{O}(\text{l}) + *$                                         | 0.94       | 0.56       | 0.77       | 0.39       | ---        | ---        | ---        | ---        |
| $\text{H}_3\text{CO} + (\text{H}^+ + \text{e}^-) \rightarrow \text{H}_3\text{COH}(\text{aq}) + *$                            | 1.01       | 0.57       | 0.88       | 0.44       | ---        | ---        | ---        | ---        |
| $\text{O} + \text{OH} + (\text{H}^+ + \text{e}^-) \rightarrow \text{O} + \text{H}_2\text{O}(\text{l})$                       | 0.03       | -0.35      | -0.10      | -0.48      | ---        | ---        | ---        | ---        |
| $\text{H}_2 + * \rightarrow \text{H} + (\text{H}^+ + \text{e}^-)$                                                            | -0.43      | -0.25      | -0.35      | -0.17      | -0.36      | -0.18      | 0.43       | 0.61       |
| <b>CrO<sub>2</sub></b>                                                                                                       |            |            |            |            |            |            |            |            |

| Intermediates                                                                                                                | 25%        |            | 50%        |            | 75%-br     |            | 75%-CUS    |            |
|------------------------------------------------------------------------------------------------------------------------------|------------|------------|------------|------------|------------|------------|------------|------------|
|                                                                                                                              | $\Delta E$ | $\Delta G$ |
| $\text{CO}_2(\text{g}) + * + (\text{H}^+ + \text{e}^-) \rightarrow \text{OCHO}$                                              | -0.78      | -0.33      | -0.60      | -0.15      | ---        | ---        | 0.49       | 0.92       |
| $\text{OCHO} + (\text{H}^+ + \text{e}^-) \rightarrow \text{HCOOH}(\text{aq}) + *$                                            | 0.87       | 0.27       | 0.69       | 0.09       | ---        | ---        | -0.41      | -0.99      |
| $\text{OCHO} + (\text{H}^+ + \text{e}^-) \rightarrow \text{HCOOH}$                                                           | 0.01       | 0.25       | 0.00       | 0.24       | ---        | ---        | ---        | ---        |
| $\text{HCOOH} + (\text{H}^+ + \text{e}^-) \rightarrow \text{H}_2\text{COOH}$                                                 | 0.03       | 0.33       | 0.42       | 0.71       | ---        | ---        | ---        | ---        |
| $\text{H}_2\text{COOH} + (\text{H}^+ + \text{e}^-) \rightarrow \text{CH}_3\text{OH}(\text{aq}) + \text{O}$                   | 0.46       | 0.07       | 0.80       | 0.41       | ---        | ---        | ---        | ---        |
| $\text{H}_2\text{COOH} + (\text{H}^+ + \text{e}^-) \rightarrow \text{H}_2\text{CO} + \text{H}_2\text{O}(\text{l})$           | 0.83       | 0.50       | 0.12       | -0.21      | ---        | ---        | ---        | ---        |
| $\text{H}_2\text{COOH} + (\text{H}^+ + \text{e}^-) \rightarrow \text{H}_3\text{CO} + \text{OH}$                              | -0.09      | 0.26       | 0.20       | 0.55       | ---        | ---        | ---        | ---        |
| $\text{O} + (\text{H}^+ + \text{e}^-) \rightarrow \text{OH}$                                                                 | -1.02      | -0.72      | -1.00      | -0.70      | ---        | ---        | ---        | ---        |
| $\text{H}_2\text{CO} + (\text{H}^+ + \text{e}^-) \rightarrow \text{H}_3\text{CO}$                                            | -1.32      | -1.02      | -0.54      | -0.24      | ---        | ---        | ---        | ---        |
| $\text{H}_3\text{CO} + \text{OH} + (\text{H}^+ + \text{e}^-) \rightarrow \text{H}_3\text{CO} + \text{H}_2\text{O}(\text{l})$ | -0.41      | -0.79      | -0.63      | -1.01      | ---        | ---        | ---        | ---        |
| $\text{H}_3\text{CO} + \text{OH} + (\text{H}^+ + \text{e}^-) \rightarrow \text{CH}_3\text{OH}(\text{aq}) + \text{OH}$        | -0.47      | -0.91      | -0.40      | -0.84      | ---        | ---        | ---        | ---        |
| $\text{OH} + (\text{H}^+ + \text{e}^-) \rightarrow \text{H}_2\text{O}(\text{l}) + *$                                         | 0.60       | 0.22       | -0.31      | -0.69      | ---        | ---        | ---        | ---        |
| $\text{H}_3\text{CO} + (\text{H}^+ + \text{e}^-) \rightarrow \text{H}_3\text{COH}(\text{aq}) + *$                            | 0.55       | 0.11       | -0.08      | -0.52      | ---        | ---        | ---        | ---        |
| $\text{O} + \text{OH} + (\text{H}^+ + \text{e}^-) \rightarrow \text{O} + \text{H}_2\text{O}(\text{l})$                       | -0.18      | -0.56      | -0.57      | -0.95      | ---        | ---        | ---        | ---        |
| $\text{H}_2 + * \rightarrow \text{H} + (\text{H}^+ + \text{e}^-)$                                                            | 0.11       | 0.29       | 1.06       | 1.24       | ---        | ---        | 1.15       | 1.33       |
| <b>PtO<sub>2</sub></b>                                                                                                       |            |            |            |            |            |            |            |            |
| Intermediates                                                                                                                | 25%        |            | 50%        |            | 75%-br     |            | 75%-CUS    |            |
|                                                                                                                              | $\Delta E$ | $\Delta G$ |
| $\text{CO}_2(\text{g}) + * + (\text{H}^+ + \text{e}^-) \rightarrow \text{OCHO}$                                              | -0.31      | 0.14       | -0.55      | -0.10      | -0.12      | 0.31       | 0.26       | 0.69       |
| $\text{OCHO} + (\text{H}^+ + \text{e}^-) \rightarrow \text{HCOOH}(\text{aq}) + *$                                            | 0.39       | -0.21      | 0.63       | 0.03       | 0.20       | -0.38      | -0.18      | -0.76      |
| $\text{OCHO} + (\text{H}^+ + \text{e}^-) \rightarrow \text{HCOOH}$                                                           | -0.28      | -0.04      | -0.27      | -0.03      | ---        | ---        | ---        | ---        |
| $\text{HCOOH} + (\text{H}^+ + \text{e}^-) \rightarrow \text{H}_2\text{COOH}$                                                 | -0.20      | 0.10       | 0.36       | 0.66       | ---        | ---        | ---        | ---        |
| $\text{H}_2\text{COOH} + (\text{H}^+ + \text{e}^-) \rightarrow \text{CH}_3\text{OH}(\text{aq}) + \text{O}$                   | 1.05       | 0.66       | 2.36       | 1.97       | ---        | ---        | ---        | ---        |
| $\text{H}_2\text{COOH} + (\text{H}^+ + \text{e}^-) \rightarrow \text{H}_2\text{CO} + \text{H}_2\text{O}(\text{l})$           | -0.14      | -0.47      | 0.14       | -0.19      | ---        | ---        | ---        | ---        |
| $\text{H}_2\text{COOH} + (\text{H}^+ + \text{e}^-) \rightarrow \text{H}_3\text{CO} + \text{OH}$                              | -0.42      | -0.07      | 0.50       | 0.85       | ---        | ---        | ---        | ---        |
| $\text{O} + (\text{H}^+ + \text{e}^-) \rightarrow \text{OH}$                                                                 | -1.51      | -1.21      | -2.23      | -1.93      | ---        | ---        | ---        | ---        |
| $\text{H}_2\text{CO} + (\text{H}^+ + \text{e}^-) \rightarrow \text{H}_3\text{CO}$                                            | -0.50      | -0.20      | -0.15      | 0.15       | ---        | ---        | ---        | ---        |
| $\text{H}_3\text{CO} + \text{OH} + (\text{H}^+ + \text{e}^-) \rightarrow \text{H}_3\text{CO} + \text{H}_2\text{O}(\text{l})$ | -0.22      | -0.60      | -0.52      | -0.90      | ---        | ---        | ---        | ---        |
| $\text{H}_3\text{CO} + \text{OH} + (\text{H}^+ + \text{e}^-) \rightarrow \text{CH}_3\text{OH}(\text{aq}) + \text{OH}$        | -0.03      | -0.47      | -0.37      | -0.81      | ---        | ---        | ---        | ---        |
| $\text{OH} + (\text{H}^+ + \text{e}^-) \rightarrow \text{H}_2\text{O}(\text{l}) + *$                                         | 0.55       | 0.17       | -0.36      | -0.74      | ---        | ---        | ---        | ---        |
| $\text{H}_3\text{CO} + (\text{H}^+ + \text{e}^-) \rightarrow \text{H}_3\text{COH}(\text{aq}) + *$                            | 0.73       | 0.29       | -0.22      | -0.66      | ---        | ---        | ---        | ---        |
| $\text{O} + \text{OH} + (\text{H}^+ + \text{e}^-) \rightarrow \text{O} + \text{H}_2\text{O}(\text{l})$                       | -0.36      | -0.74      | -0.37      | -0.75      | ---        | ---        | ---        | ---        |
| $\text{H}_2 + * \rightarrow \text{H} + (\text{H}^+ + \text{e}^-)$                                                            | -0.34      | -0.16      | -0.50      | -0.32      | -0.39      | -0.21      | -0.56      | -0.38      |
| <b>RhO<sub>2</sub></b>                                                                                                       |            |            |            |            |            |            |            |            |

| Intermediates                                                                                                                | 25%        |            | 50%        |            | 75%-br     |            | 75%-CUS    |            |
|------------------------------------------------------------------------------------------------------------------------------|------------|------------|------------|------------|------------|------------|------------|------------|
|                                                                                                                              | $\Delta E$ | $\Delta G$ |
| $\text{CO}_2(\text{g}) + * + (\text{H}^+ + \text{e}^-) \rightarrow \text{OCHO}$                                              | -0.68      | -0.23      | -0.76      | -0.31      | -0.61      | -0.18      | 0.38       | 0.81       |
| $\text{OCHO} + (\text{H}^+ + \text{e}^-) \rightarrow \text{HCOOH}(\text{aq}) + *$                                            | 0.76       | 0.16       | 0.84       | 0.24       | 0.69       | 0.11       | -0.29      | -0.87      |
| $\text{OCHO} + (\text{H}^+ + \text{e}^-) \rightarrow \text{HCOOH}$                                                           | 0.20       | 0.44       | 0.20       | 0.44       | ---        | ---        | ---        | ---        |
| $\text{HCOOH} + (\text{H}^+ + \text{e}^-) \rightarrow \text{H}_2\text{COOH}$                                                 | -0.32      | -0.02      | -0.30      | 0.00       | ---        | ---        | ---        | ---        |
| $\text{H}_2\text{COOH} + (\text{H}^+ + \text{e}^-) \rightarrow \text{CH}_3\text{OH}(\text{aq}) + \text{O}$                   | 1.27       | 0.88       | 1.34       | 0.95       | ---        | ---        | ---        | ---        |
| $\text{H}_2\text{COOH} + (\text{H}^+ + \text{e}^-) \rightarrow \text{H}_2\text{CO} + \text{H}_2\text{O}(\text{l})$           | 0.45       | 0.12       | 0.77       | 0.44       | ---        | ---        | ---        | ---        |
| $\text{H}_2\text{COOH} + (\text{H}^+ + \text{e}^-) \rightarrow \text{H}_3\text{CO} + \text{OH}$                              | 0.20       | 0.55       | 0.15       | 0.50       | ---        | ---        | ---        | ---        |
| $\text{O} + (\text{H}^+ + \text{e}^-) \rightarrow \text{OH}$                                                                 | -1.48      | -1.18      | -1.57      | -1.27      | ---        | ---        | ---        | ---        |
| $\text{H}_2\text{CO} + (\text{H}^+ + \text{e}^-) \rightarrow \text{H}_3\text{CO}$                                            | -0.80      | -0.50      | -1.09      | -0.79      | ---        | ---        | ---        | ---        |
| $\text{H}_3\text{CO} + \text{OH} + (\text{H}^+ + \text{e}^-) \rightarrow \text{H}_3\text{CO} + \text{H}_2\text{O}(\text{l})$ | -0.55      | -0.93      | -0.47      | -0.85      | ---        | ---        | ---        | ---        |
| $\text{H}_3\text{CO} + \text{OH} + (\text{H}^+ + \text{e}^-) \rightarrow \text{CH}_3\text{OH}(\text{aq}) + \text{OH}$        | -0.42      | -0.86      | -0.39      | -0.83      | ---        | ---        | ---        | ---        |
| $\text{OH} + (\text{H}^+ + \text{e}^-) \rightarrow \text{H}_2\text{O}(\text{l}) + *$                                         | 0.32       | -0.06      | 0.40       | 0.02       | ---        | ---        | ---        | ---        |
| $\text{H}_3\text{CO} + (\text{H}^+ + \text{e}^-) \rightarrow \text{H}_3\text{COH}(\text{aq}) + *$                            | 0.46       | 0.02       | 0.49       | 0.05       | ---        | ---        | ---        | ---        |
| $\text{O} + \text{OH} + (\text{H}^+ + \text{e}^-) \rightarrow \text{O} + \text{H}_2\text{O}(\text{l})$                       | -0.78      | -1.16      | -0.45      | -0.83      | ---        | ---        | ---        | ---        |
| $\text{H}_2 + * \rightarrow \text{H} + (\text{H}^+ + \text{e}^-)$                                                            | -0.22      | -0.04      | -0.21      | -0.03      | -0.19      | -0.01      | 0.26       | 0.44       |
| <b>MnO<sub>2</sub></b>                                                                                                       |            |            |            |            |            |            |            |            |
| Intermediates                                                                                                                | 25%        |            | 50%        |            | 75%-br     |            | 75%-CUS    |            |
|                                                                                                                              | $\Delta E$ | $\Delta G$ |
| $\text{CO}_2(\text{g}) + * + (\text{H}^+ + \text{e}^-) \rightarrow \text{OCHO}$                                              | 0.10       | 0.55       | 0.54       | 0.99       | ---        | ---        | ---        | ---        |
| $\text{OCHO} + (\text{H}^+ + \text{e}^-) \rightarrow \text{HCOOH}(\text{aq}) + *$                                            | -0.02      | -0.62      | -0.46      | -1.06      | ---        | ---        | ---        | ---        |
| $\text{OCHO} + (\text{H}^+ + \text{e}^-) \rightarrow \text{HCOOH}$                                                           | -0.33      | -0.09      | -0.84      | -0.60      | ---        | ---        | ---        | ---        |
| $\text{HCOOH} + (\text{H}^+ + \text{e}^-) \rightarrow \text{H}_2\text{COOH}$                                                 | 0.37       | 0.67       | 0.74       | 1.04       | ---        | ---        | ---        | ---        |
| $\text{H}_2\text{COOH} + (\text{H}^+ + \text{e}^-) \rightarrow \text{CH}_3\text{OH}(\text{aq}) + \text{O}$                   | 0.38       | -0.01      | 1.42       | 1.03       | ---        | ---        | ---        | ---        |
| $\text{H}_2\text{COOH} + (\text{H}^+ + \text{e}^-) \rightarrow \text{H}_2\text{CO} + \text{H}_2\text{O}(\text{l})$           | 0.07       | -0.26      | -0.31      | -0.64      | ---        | ---        | ---        | ---        |
| $\text{H}_2\text{COOH} + (\text{H}^+ + \text{e}^-) \rightarrow \text{H}_3\text{CO} + \text{OH}$                              | 0.01       | 0.37       | 0.12       | 0.48       | ---        | ---        | ---        | ---        |
| $\text{O} + (\text{H}^+ + \text{e}^-) \rightarrow \text{OH}$                                                                 | -1.27      | -0.97      | -1.89      | -1.59      | ---        | ---        | ---        | ---        |
| $\text{H}_2\text{CO} + (\text{H}^+ + \text{e}^-) \rightarrow \text{H}_3\text{CO}$                                            | -0.88      | -0.58      | -0.32      | -0.02      | ---        | ---        | ---        | ---        |
| $\text{H}_3\text{CO} + \text{OH} + (\text{H}^+ + \text{e}^-) \rightarrow \text{H}_3\text{CO} + \text{H}_2\text{O}(\text{l})$ | -0.82      | -1.20      | -0.76      | -1.14      | ---        | ---        | ---        | ---        |
| $\text{H}_3\text{CO} + \text{OH} + (\text{H}^+ + \text{e}^-) \rightarrow \text{CH}_3\text{OH}(\text{aq}) + \text{OH}$        | -0.90      | -1.34      | -0.59      | -1.03      | ---        | ---        | ---        | ---        |
| $\text{OH} + (\text{H}^+ + \text{e}^-) \rightarrow \text{H}_2\text{O}(\text{l}) + *$                                         | 0.05       | -0.33      | -0.66      | -1.04      | ---        | ---        | ---        | ---        |
| $\text{H}_3\text{CO} + (\text{H}^+ + \text{e}^-) \rightarrow \text{H}_3\text{COH}(\text{aq}) + *$                            | -0.03      | -0.47      | -0.50      | -0.94      | ---        | ---        | ---        | ---        |
| $\text{O} + \text{OH} + (\text{H}^+ + \text{e}^-) \rightarrow \text{O} + \text{H}_2\text{O}(\text{l})$                       | -1.11      | -1.49      | -0.56      | -0.94      | ---        | ---        | ---        | ---        |
| $\text{H}_2 + * \rightarrow \text{H} + (\text{H}^+ + \text{e}^-)$                                                            | 0.45       | 0.63       | 0.93       | 1.11       | ---        | ---        | ---        | ---        |
| <b>PdO<sub>2</sub></b>                                                                                                       |            |            |            |            |            |            |            |            |



| Intermediates                                                                                                                | 25%        |            | 50%        |            | 75%-br     |            | 75%-CUS    |            |
|------------------------------------------------------------------------------------------------------------------------------|------------|------------|------------|------------|------------|------------|------------|------------|
|                                                                                                                              | $\Delta E$ | $\Delta G$ |
| $\text{CO}_2(\text{g}) + * + (\text{H}^+ + \text{e}^-) \rightarrow \text{OCHO}$                                              | 0.26       | 0.71       | 0.33       | 0.78       | -0.09      | 0.34       | 0.68       | 1.11       |
| $\text{OCHO} + (\text{H}^+ + \text{e}^-) \rightarrow \text{HCOOH}(\text{aq}) + *$                                            | -0.17      | -0.77      | -0.25      | -0.85      | 0.17       | -0.41      | -0.60      | -1.18      |
| $\text{OCHO} + (\text{H}^+ + \text{e}^-) \rightarrow \text{HCOOH}$                                                           | -0.46      | -0.22      | -0.76      | -0.52      | ---        | ---        | ---        | ---        |
| $\text{HCOOH} + (\text{H}^+ + \text{e}^-) \rightarrow \text{H}_2\text{COOH}$                                                 | 0.23       | 0.53       | 0.97       | 1.27       | ---        | ---        | ---        | ---        |
| $\text{H}_2\text{COOH} + (\text{H}^+ + \text{e}^-) \rightarrow \text{CH}_3\text{OH}(\text{aq}) + \text{O}$                   | 1.23       | 0.85       | 2.37       | 1.98       | ---        | ---        | ---        | ---        |
| $\text{H}_2\text{COOH} + (\text{H}^+ + \text{e}^-) \rightarrow \text{H}_2\text{CO} + \text{H}_2\text{O}(\text{l})$           | 0.10       | -0.23      | -0.50      | -0.83      | ---        | ---        | ---        | ---        |
| $\text{H}_2\text{COOH} + (\text{H}^+ + \text{e}^-) \rightarrow \text{H}_3\text{CO} + \text{OH}$                              | 0.35       | 0.70       | 0.50       | 0.85       | ---        | ---        | ---        | ---        |
| $\text{O} + (\text{H}^+ + \text{e}^-) \rightarrow \text{OH}$                                                                 | -1.92      | -1.62      | -2.44      | -2.14      | ---        | ---        | ---        | ---        |
| $\text{H}_2\text{CO} + (\text{H}^+ + \text{e}^-) \rightarrow \text{H}_3\text{CO}$                                            | -0.80      | -0.50      | 0.22       | 0.52       | ---        | ---        | ---        | ---        |
| $\text{H}_3\text{CO} + \text{OH} + (\text{H}^+ + \text{e}^-) \rightarrow \text{H}_3\text{CO} + \text{H}_2\text{O}(\text{l})$ | -1.05      | -1.43      | -0.79      | -1.17      | ---        | ---        | ---        | ---        |
| $\text{H}_3\text{CO} + \text{OH} + (\text{H}^+ + \text{e}^-) \rightarrow \text{CH}_3\text{OH}(\text{aq}) + \text{OH}$        | -1.04      | -1.48      | -0.57      | -1.01      | ---        | ---        | ---        | ---        |
| $\text{OH} + (\text{H}^+ + \text{e}^-) \rightarrow \text{H}_2\text{O}(\text{l}) + *$                                         | -0.02      | -0.40      | -1.16      | -1.54      | ---        | ---        | ---        | ---        |
| $\text{H}_3\text{CO} + (\text{H}^+ + \text{e}^-) \rightarrow \text{H}_3\text{COH}(\text{aq}) + *$                            | -0.01      | -0.45      | -0.95      | -1.39      | ---        | ---        | ---        | ---        |
| $\text{O} + \text{OH} + (\text{H}^+ + \text{e}^-) \rightarrow \text{O} + \text{H}_2\text{O}(\text{l})$                       | -1.16      | -1.54      | -0.82      | -1.20      | ---        | ---        | ---        | ---        |
| $\text{H}_2 + * \rightarrow \text{H} + (\text{H}^+ + \text{e}^-)$                                                            | 0.11       | 0.29       | 0.47       | 0.65       | -0.12      | 0.06       | 0.15       | 0.33       |



|                  |         |      |      |      |      |       |       |
|------------------|---------|------|------|------|------|-------|-------|
|                  | 75%-br  | ---- | ---- | ---- | ---- | ----  | ----  |
|                  | 75%-CUS | ---- | ---- | ---- | ---- | ----  | ----  |
| PtO <sub>2</sub> | 0%      | ---- | ---- | ---- | ---- | -0.37 | -0.19 |
|                  | 25%     | ---- | ---- | ---- | ---- | 0.60  | 0.78  |
|                  | 50%     | ---- | ---- | ---- | ---- | ----  | ----  |
|                  | 75%-br  | ---- | ---- | ---- | ---- | 0.17  | 0.36  |
|                  | 75%-CUS | ---- | ---- | ---- | ---- | ----  | ----  |

\*RhO<sub>2</sub>, MnO<sub>2</sub> and PdO<sub>2</sub> do not bind CO<sub>2</sub> on their surfaces at any coverages.

Table S5. Selectivity of different TMOs toward CO<sub>2</sub>RR or HER products and their free energy binding strength order for 0%, 25%, 50% and 75% CO coverage with br-br-CUS configuration (vacant CUS) and br-CUS-CUS configuration (vacant br) at U=0. CO<sub>2</sub> can either adsorb through its oxygen atom both bidentate (O<sub>b</sub>) and linear (O<sub>l</sub>) and through its carbon atom (C). In the case of MnO<sub>2</sub>, 75% CO coverage formation is not possible (shown with dashed line).

| Catalysts        |                         | CO coverage                             |                                         |                                         |                                 |                                 |
|------------------|-------------------------|-----------------------------------------|-----------------------------------------|-----------------------------------------|---------------------------------|---------------------------------|
|                  |                         | 0%                                      | 25%                                     | 50%                                     | 75%                             |                                 |
|                  |                         |                                         |                                         |                                         | vacant CUS                      | vacant br                       |
| HfO <sub>2</sub> | Binding strength        | H < C                                   | O <sub>l</sub> < O <sub>b</sub> < H     | O <sub>l</sub> < H < C                  | C < H < O <sub>l</sub>          | O <sub>l</sub> < H < C          |
|                  | Selectivity at U=0      | CO <sub>2</sub> RR                      | HER                                     | CO <sub>2</sub> RR                      | CO <sub>2</sub> RR              | CO <sub>2</sub> RR              |
|                  | Possible product at U=0 | CO                                      | H <sub>2</sub>                          | CO                                      | CO<br>/HCOOH/CH <sub>3</sub> OH | CO                              |
| MoO <sub>2</sub> | Binding strength        | O <sub>l</sub> < C < H < O <sub>b</sub> | O <sub>b</sub> < O <sub>l</sub> < H     | H < C < O <sub>b</sub> < O <sub>l</sub> | H < O <sub>l</sub>              | H = C < O <sub>l</sub>          |
|                  | Selectivity at U=0      | CO <sub>2</sub> RR                      | HER                                     | CO <sub>2</sub> RR                      | CO <sub>2</sub> RR              | CO <sub>2</sub> RR              |
|                  | Possible product at U=0 | HCOOH/CH <sub>3</sub> OH                | H <sub>2</sub>                          | CO<br>/HCOOH/CH <sub>3</sub> OH         | CO<br>/HCOOH/CH <sub>3</sub> OH | CO<br>/HCOOH/CH <sub>3</sub> OH |
| OsO <sub>2</sub> | Binding strength        | O <sub>l</sub> < O <sub>b</sub> < H < C | O <sub>l</sub> < H                      | O <sub>l</sub> < O <sub>b</sub> < C < H | O <sub>l</sub> < H              | C < O <sub>l</sub> < H          |
|                  | Selectivity at U=0      | CO <sub>2</sub> RR                      | HER                                     | HER                                     | HER                             | HER                             |
|                  | Possible product at U=0 | CO                                      | H <sub>2</sub>                          | H <sub>2</sub>                          | H <sub>2</sub>                  | H <sub>2</sub>                  |
| NbO <sub>2</sub> | Binding strength        | O <sub>l</sub> < O <sub>b</sub> < H < C | O <sub>l</sub> < O <sub>b</sub> < C < H | O <sub>b</sub> < O <sub>l</sub> < H     | H < O <sub>l</sub>              | O <sub>l</sub> < C < H          |
|                  | Selectivity at U=0      | CO <sub>2</sub> RR                      | HER                                     | HER                                     | CO <sub>2</sub> RR              | HER                             |
|                  | Possible product at U=0 | CO                                      | H <sub>2</sub>                          | H <sub>2</sub>                          | CO<br>/HCOOH/CH <sub>3</sub> OH | H <sub>2</sub>                  |
| TiO <sub>2</sub> | Binding strength        | O <sub>l</sub> < O <sub>b</sub> < H < C | O <sub>b</sub> < O <sub>l</sub> < H < C | H < O <sub>l</sub>                      | H < O <sub>l</sub>              | H                               |
|                  | Selectivity at U=0      | CO <sub>2</sub> RR                      | CO <sub>2</sub> RR                      | CO <sub>2</sub> RR                      | CO <sub>2</sub> RR              | HER                             |
|                  | Possible product at U=0 | CO                                      | CO                                      | CO<br>/HCOOH/CH <sub>3</sub> OH         | CO<br>/HCOOH/CH <sub>3</sub> OH | H <sub>2</sub>                  |
| IrO <sub>2</sub> | Binding strength        | O <sub>l</sub> < O <sub>b</sub> < H = C | O <sub>b</sub> < O <sub>l</sub> < C < H | H < C                                   | O <sub>l</sub> < H              | O <sub>l</sub> < C < H          |
|                  | Selectivity at U=0      | HER/CO <sub>2</sub> RR                  | HER                                     | CO <sub>2</sub> RR                      | HER                             | HER                             |
|                  | Possible product at U=0 | H <sub>2</sub> /CO                      | H <sub>2</sub>                          | CO                                      | H <sub>2</sub>                  | H <sub>2</sub>                  |
| RuO <sub>2</sub> | Binding strength        | O <sub>l</sub> < C < H                  | O <sub>l</sub> < H                      | O <sub>l</sub> < H                      | O <sub>l</sub> < H              | O <sub>l</sub> < H              |
|                  | Selectivity at U=0      | HER                                     | HER                                     | HER                                     | HER                             | HER                             |
|                  | Possible product at U=0 | H <sub>2</sub>                          | H <sub>2</sub>                          | H <sub>2</sub>                          | H <sub>2</sub>                  | H <sub>2</sub>                  |
| CrO <sub>2</sub> | Binding strength        | C < H                                   | H                                       | H                                       | H                               | H                               |
|                  | Selectivity at U=0      | HER                                     | HER                                     | HER                                     | HER                             | HER                             |
|                  | Possible product at U=0 | H <sub>2</sub>                          | H <sub>2</sub>                          | H <sub>2</sub>                          | H <sub>2</sub>                  | H <sub>2</sub>                  |
| PtO <sub>2</sub> | Binding strength        | C < H                                   | C < H                                   | H                                       | H                               | C < H                           |
|                  | Selectivity at U=0      | HER                                     | HER                                     | HER                                     | HER                             | HER                             |
|                  | Possible product at U=0 | H <sub>2</sub>                          | H <sub>2</sub>                          | H <sub>2</sub>                          | H <sub>2</sub>                  | H <sub>2</sub>                  |
| RhO <sub>2</sub> | Binding strength        | H                                       | H                                       | H                                       | H                               | H                               |
|                  | Selectivity at U=0      | HER                                     | HER                                     | HER                                     | HER                             | HER                             |
|                  | Possible product at U=0 | H <sub>2</sub>                          | H <sub>2</sub>                          | H <sub>2</sub>                          | H <sub>2</sub>                  | H <sub>2</sub>                  |
| MnO <sub>2</sub> | Binding strength        | H                                       | H                                       | H                                       | ---                             | ---                             |
|                  | Selectivity at U=0      | HER                                     | HER                                     | HER                                     | ---                             | ---                             |

|                  |                         |                |                |                |                |                |
|------------------|-------------------------|----------------|----------------|----------------|----------------|----------------|
|                  | Possible product at U=0 | H <sub>2</sub> | H <sub>2</sub> | H <sub>2</sub> | ---            | ---            |
| PdO <sub>2</sub> | Binding strength        | H              | H              | H              | H              | H              |
|                  | Selectivity at U=0      | HER            | HER            | HER            | HER            | HER            |
|                  | Possible product at U=0 | H <sub>2</sub> |

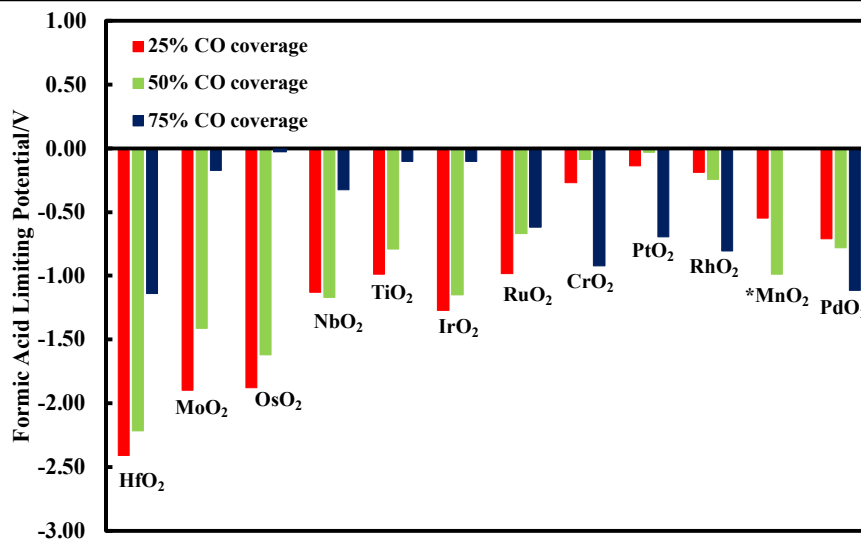

Figure S1. Limiting potentials towards formic acid formation at varying CO coverages (75% CO coverage with br-br-CUS configuration). MnO<sub>2</sub> is not able to hold the third CO (75% coverage) on its surface and therefore, there is one data column missing for it in the diagram.

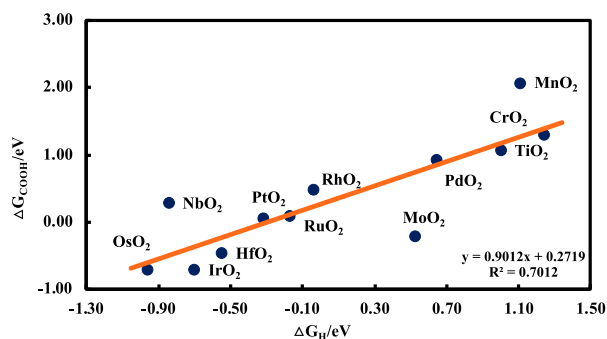

Figure S2. Scaling relation for TMOs for H vs. COOH for 50% CO coverage.

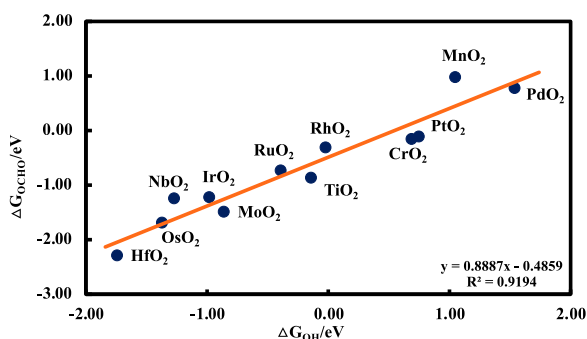

Figure S3. Scaling relation for TMOs for OH vs. OCHO for 50% CO coverage.

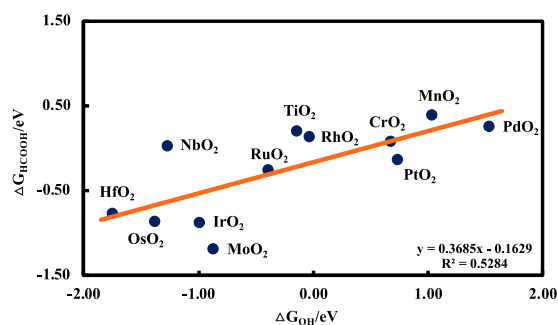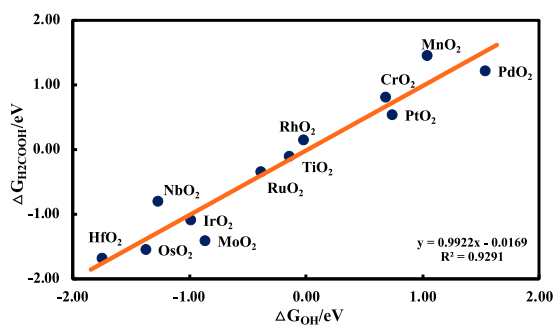

Figure S4. Scaling relation for TMOs for OH vs. HCOOH for 50% CO coverage.

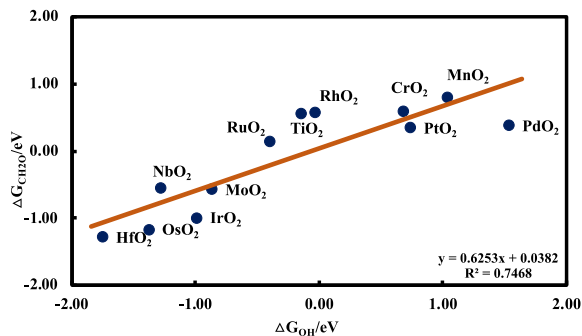

Figure S6. Scaling relation for TMOs for OH vs. CH<sub>2</sub>O for 50% CO coverage.

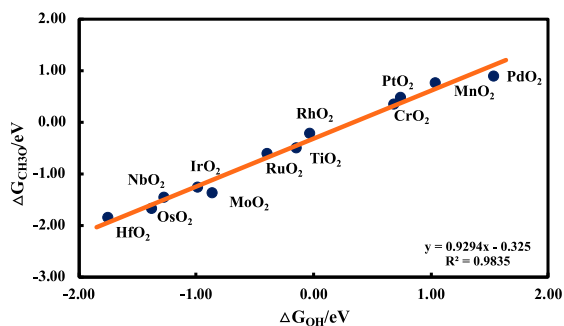

Figure S8. Scaling relation for TMOs for OH vs. CH<sub>3</sub>O for 50% CO coverage.

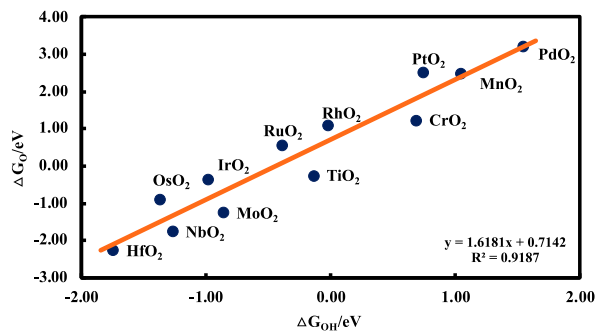

Figure S10. Scaling relation for TMOs for OH vs. O for 50% CO coverage.

Figure S5. Scaling relation for TMOs for OH vs. H<sub>2</sub>COOH for 50% CO coverage.

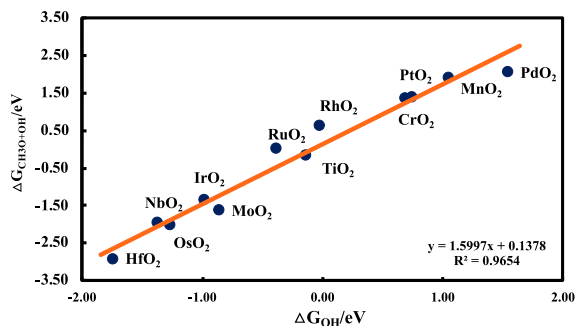

Figure S7. Scaling relation for TMOs for OH vs. CH<sub>3</sub>O+OH for 50% CO coverage.

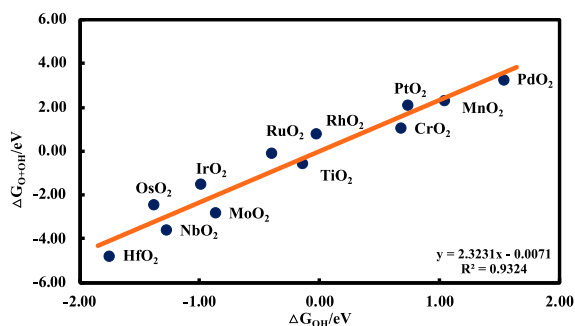

Figure S9. Scaling relation for TMOs for OH vs. O+OH for 50% CO coverage.

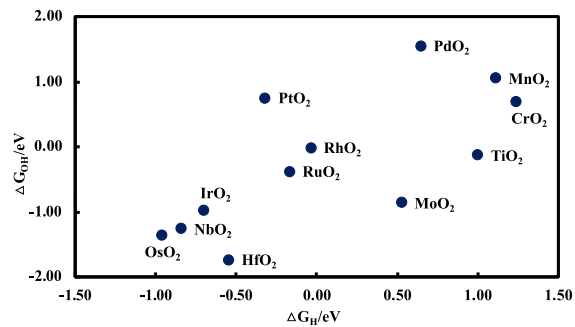

Figure S11. Scaling relation for TMOs for H vs. OH for 50% CO coverage.

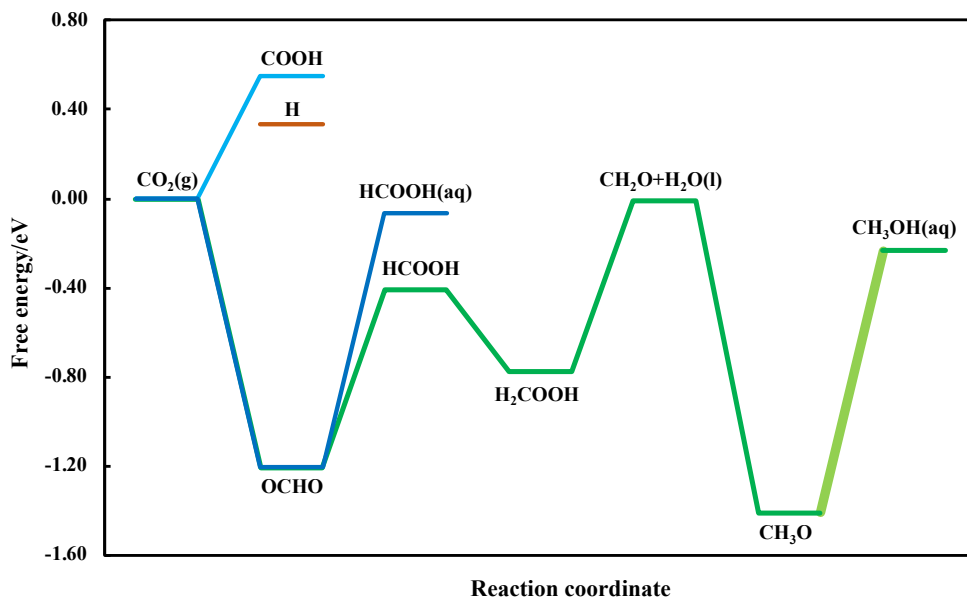

Figure S12. Free energy diagram for  $\text{HfO}_2$  for 75% CO coverage with br-br-CUS CO configuration. Different reaction pathways for formic acid and methanol products are presented. Potential limiting step is presented for methanol with light green line.

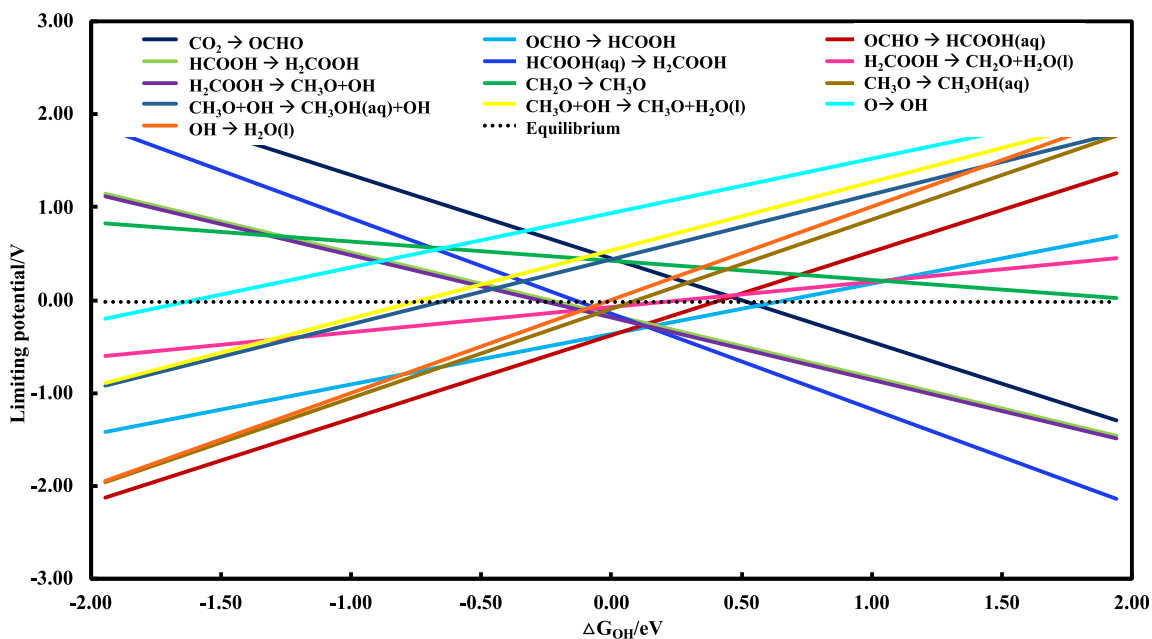

Figure S13. Theoretical volcano for formation of methanol including 50% CO coverage on the TMO surfaces. Each line indicates a reaction step.

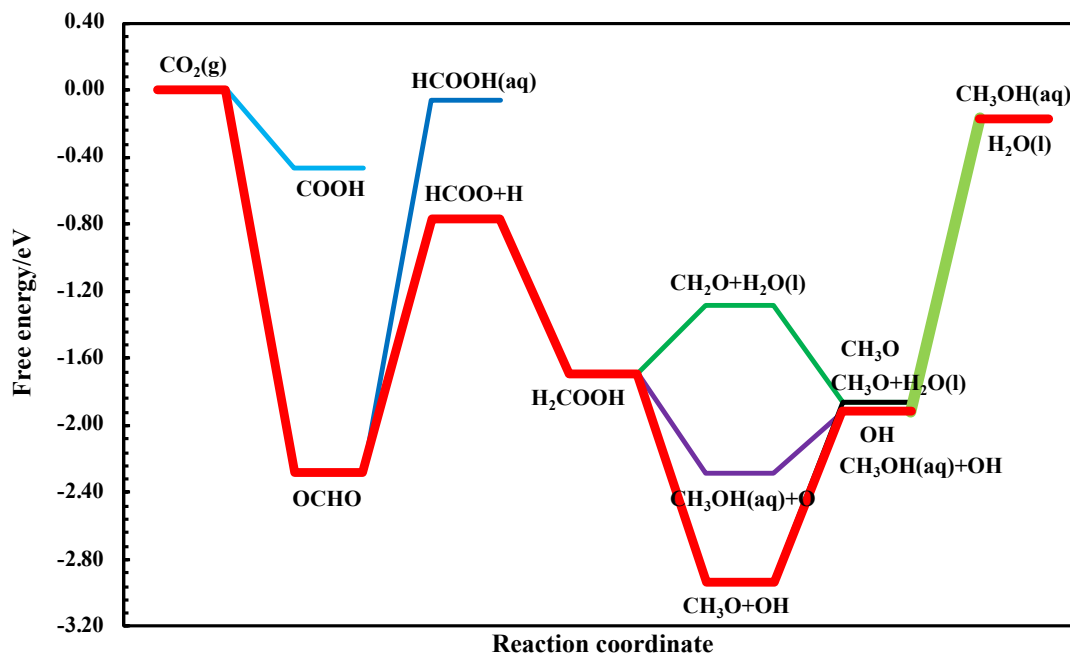

Figure S14. Free energy diagram for HfO<sub>2</sub> for 50% CO coverage. Different reaction pathways for formic acid and methanol products are presented. Potential limiting step is presented for methanol with light green line.

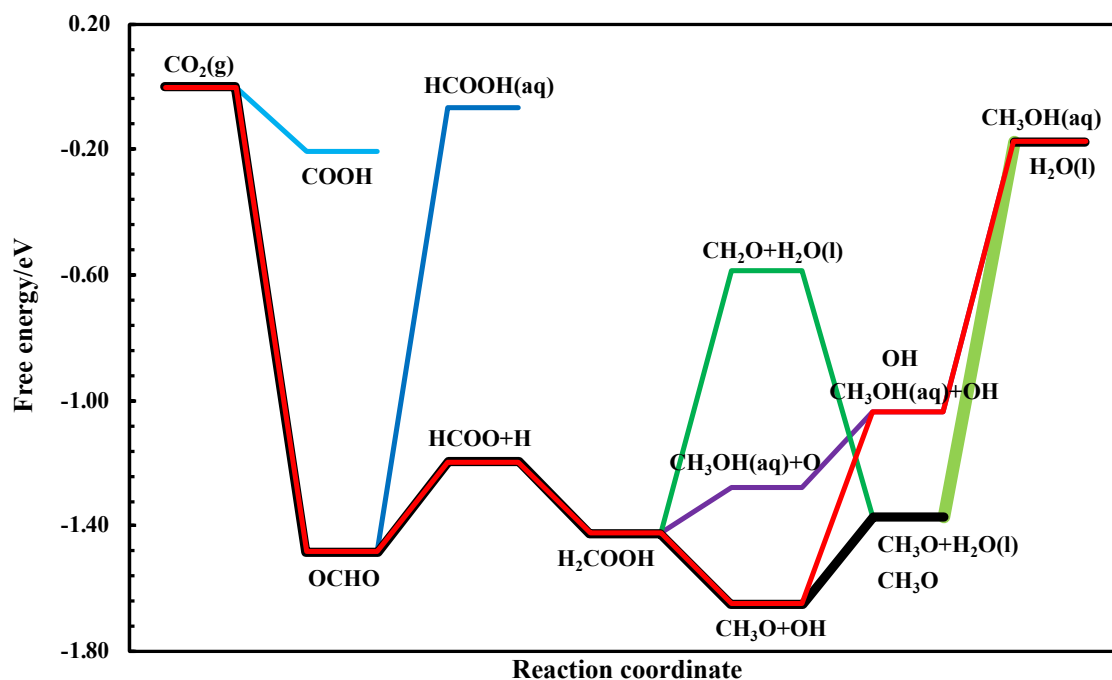

Figure S15. Free energy diagram for MoO<sub>2</sub> for 50% CO coverage. Different reaction pathways for formic acid and methanol products are presented. Potential limiting step is presented for methanol with light green line.

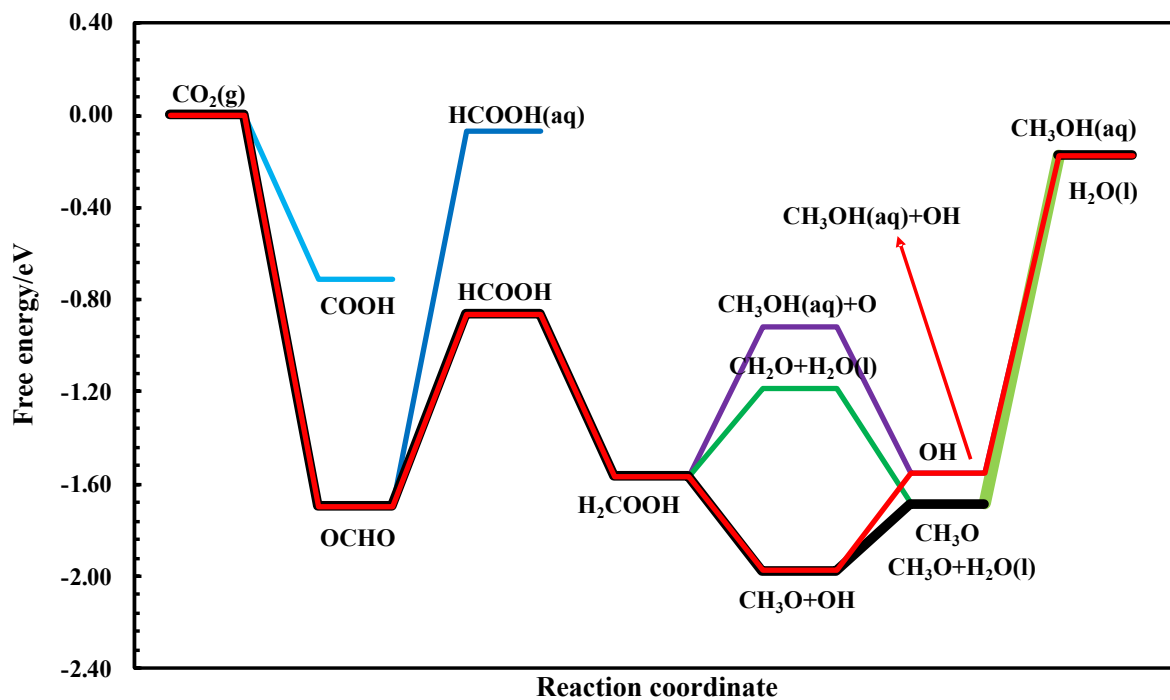

Figure S16. Free energy diagram for OsO<sub>2</sub> for 50% CO coverage. Different reaction pathways for formic acid and methanol products are presented. Potential limiting step is presented for methanol with light green line.

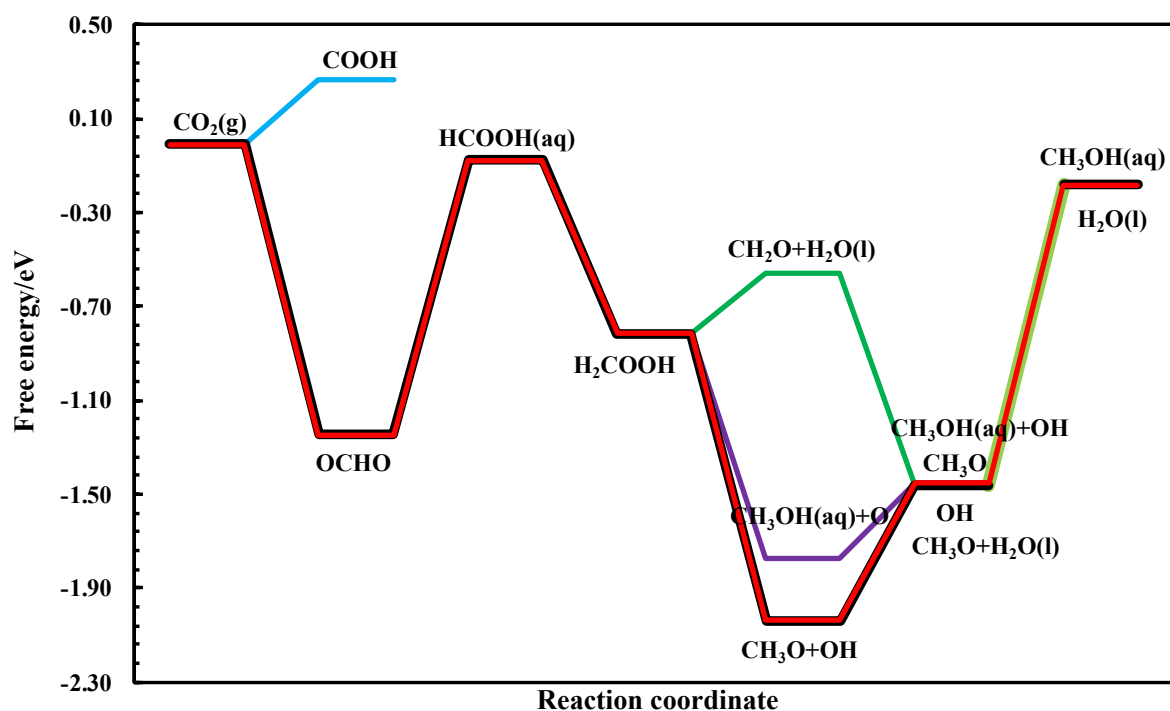

Figure S17. Free energy diagram for NbO<sub>2</sub> for 50% CO coverage. Different reaction pathways for formic acid and methanol products are presented. Potential limiting step is presented for methanol with light green line.



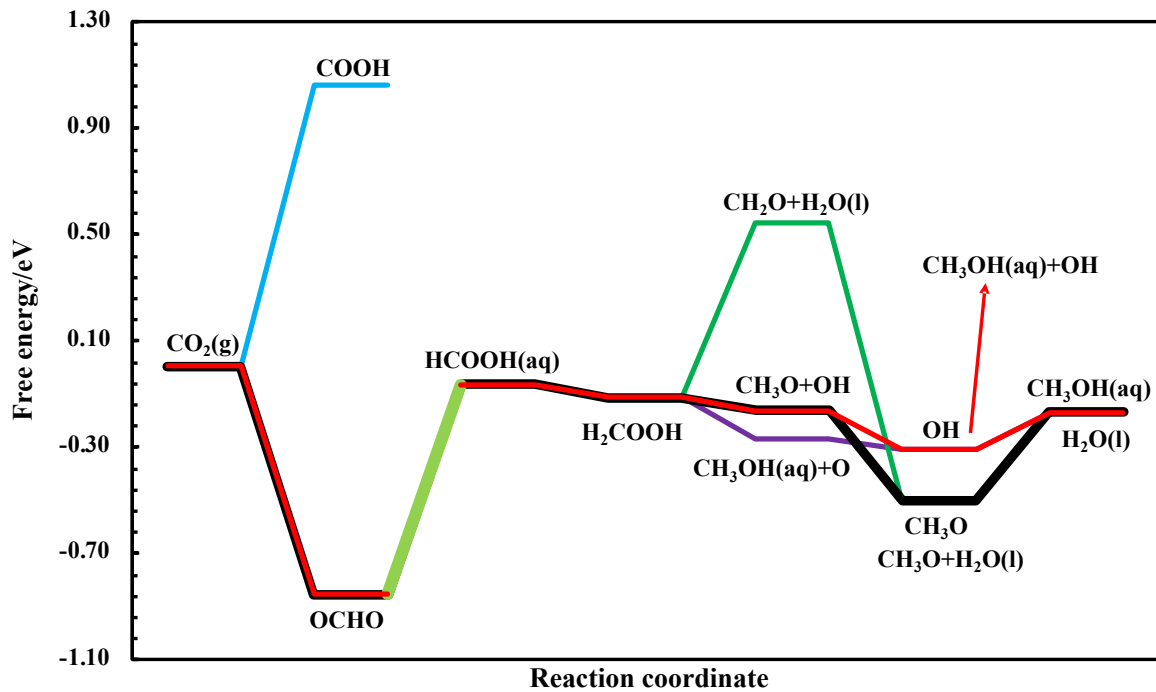

Figure S18. Free energy diagram for  $\text{TiO}_2$  for 50% CO coverage. Different reaction pathways for formic acid and methanol products are presented. Potential limiting step is presented for methanol with light green line.

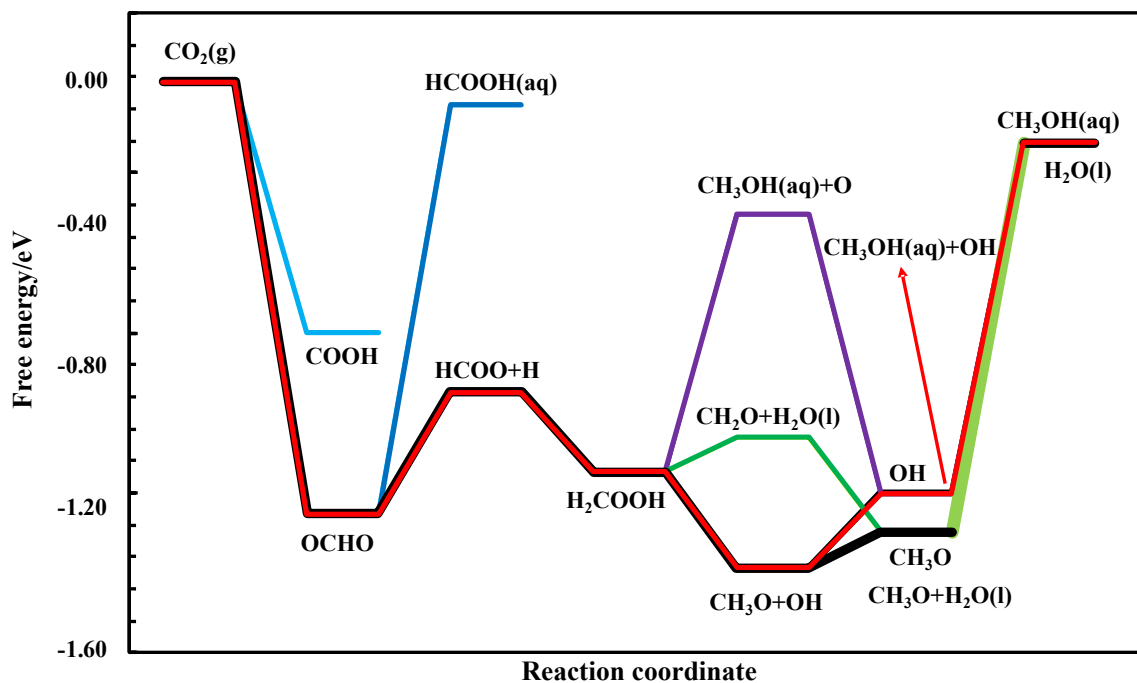

Figure S19. Free energy diagram for  $\text{IrO}_2$  for 50% CO coverage. Different reaction pathways for formic acid and methanol products are presented. Potential limiting step is presented for methanol with light green line.

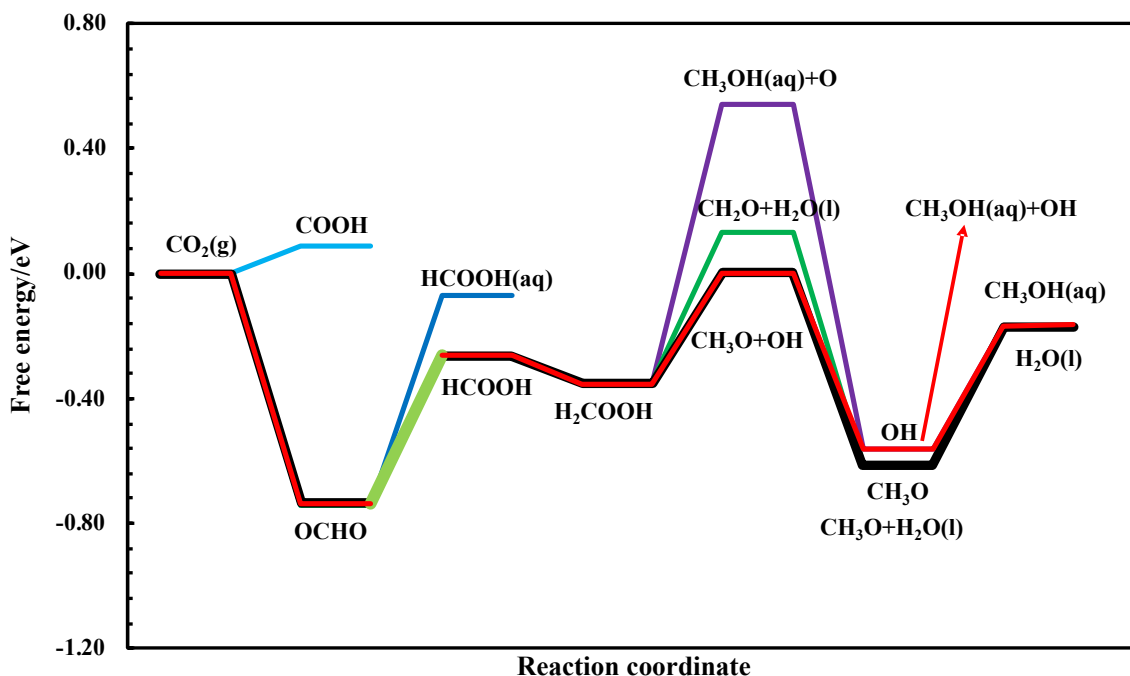

Figure S20. Free energy diagram for RuO<sub>2</sub> for 50% CO coverage. Different reaction pathways for formic acid and methanol products are presented. Potential limiting step is presented for methanol with light green line.

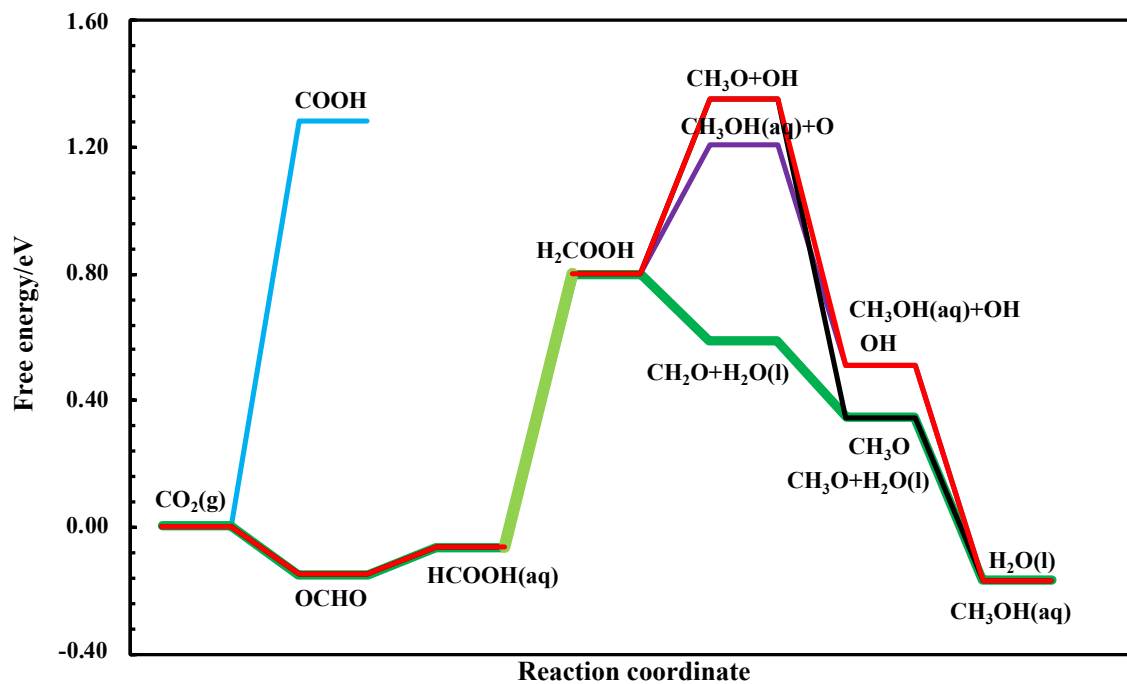

Figure S21. Free energy diagram for CrO<sub>2</sub> for 50% CO coverage. Different reaction pathways for formic acid and methanol products are presented. Potential limiting step is presented for methanol with light green line.

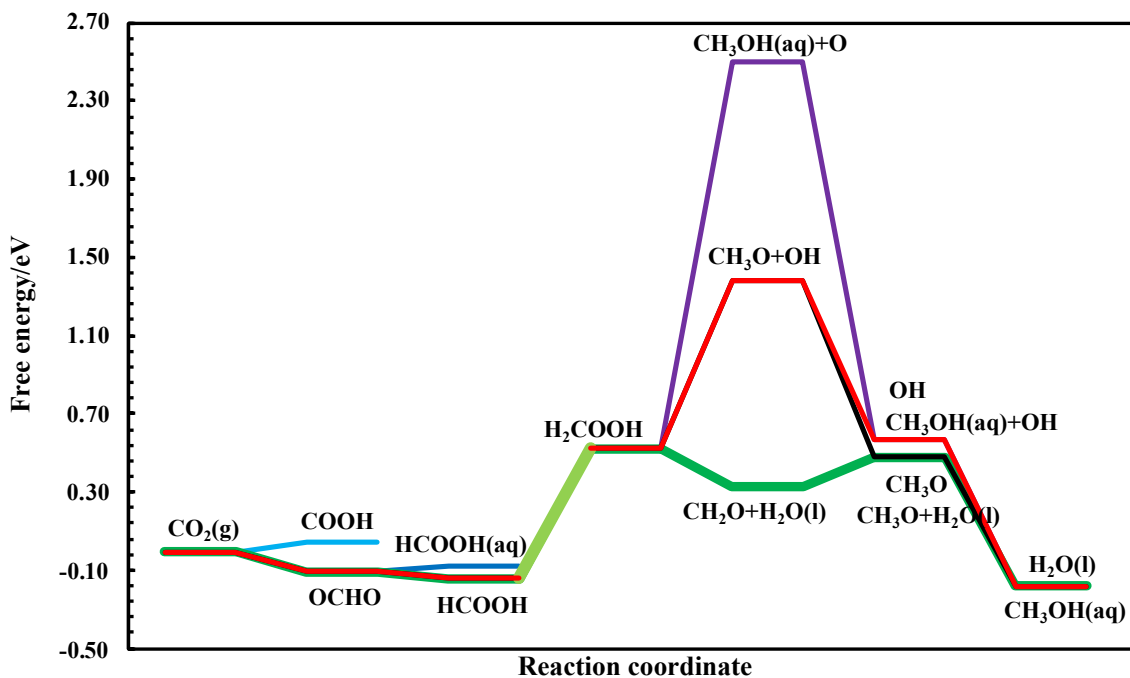

Figure S22. Free energy diagram for PtO<sub>2</sub> for 50% CO coverage. Different reaction pathways for formic acid and methanol products are presented. Potential limiting step is presented for methanol with light green line.

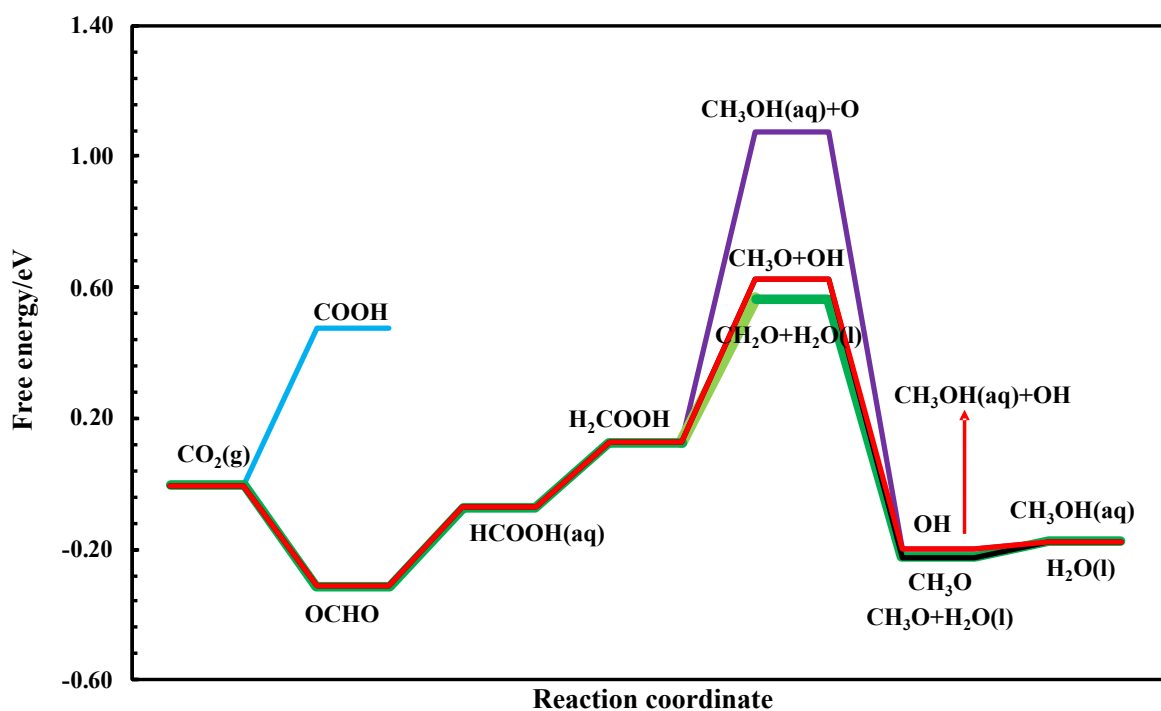

Figure S23. Free energy diagram for RhO<sub>2</sub> for 50% CO coverage. Different reaction pathways for formic acid and methanol products are presented. Potential limiting step is presented for methanol with light green line.

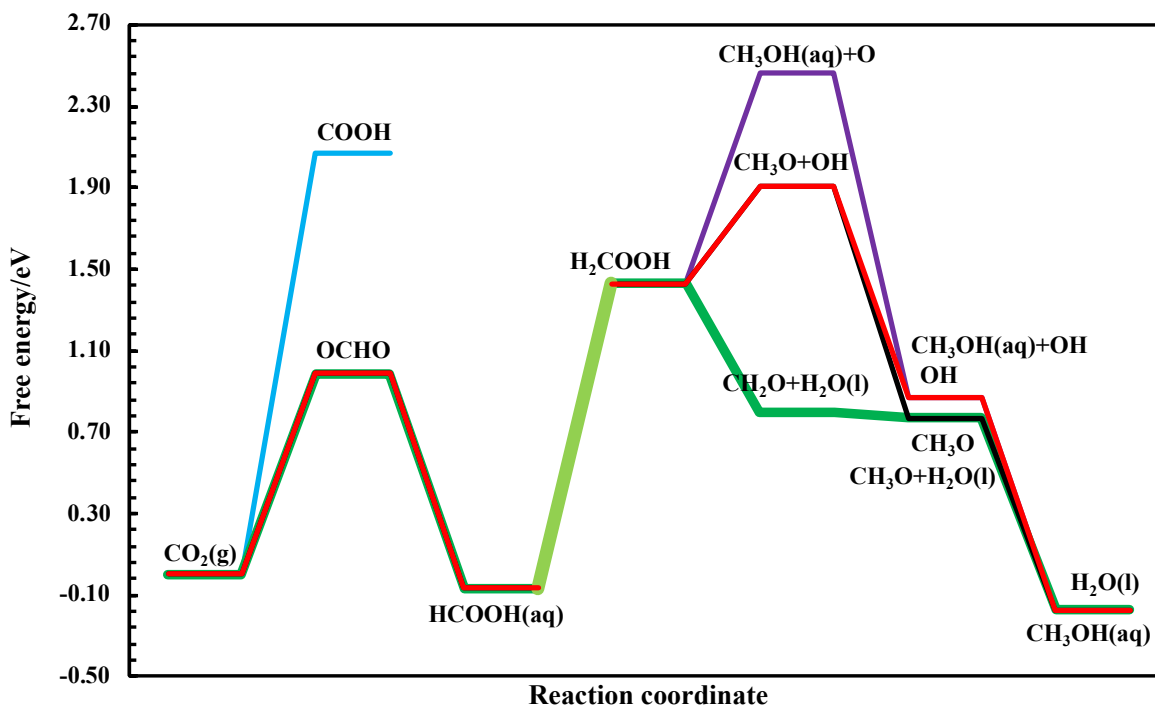

Figure S24. Free energy diagram for MnO<sub>2</sub> for 50% CO coverage. Different reaction pathways for formic acid and methanol products are presented. Potential limiting step is presented for methanol with light green line.

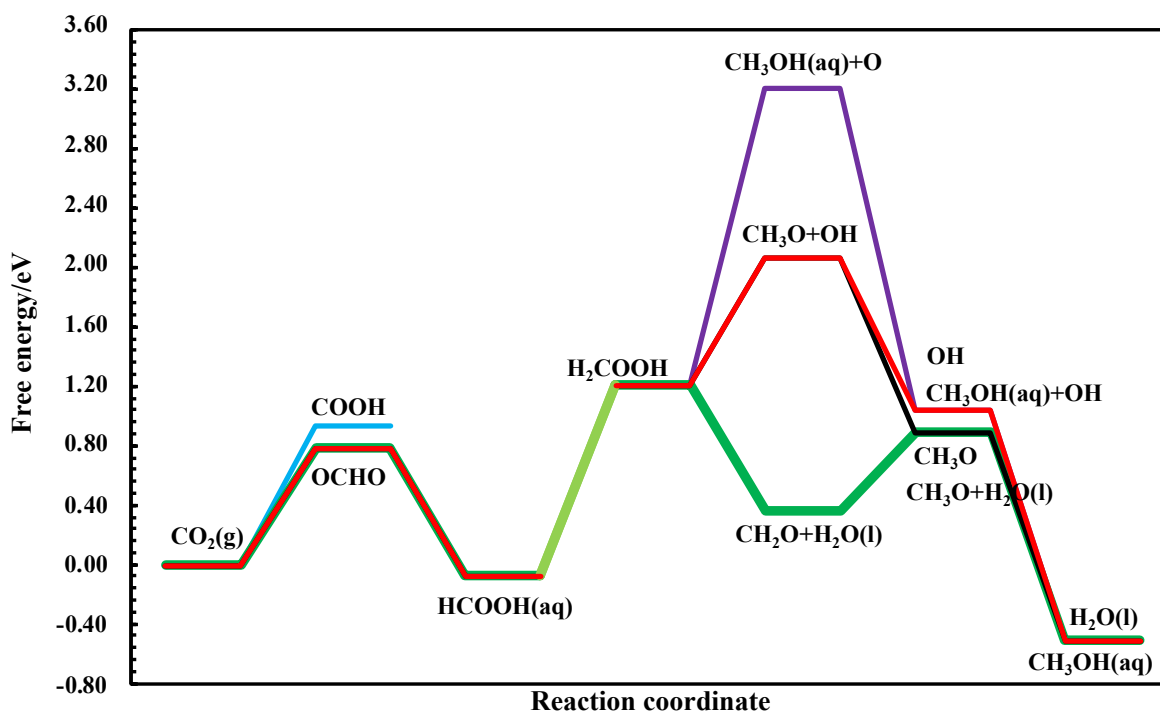

Figure S25. Free energy diagram for PdO<sub>2</sub> for 50% CO coverage. Different reaction pathways for formic acid and methanol products are presented. Potential limiting step is presented for methanol with light green line.

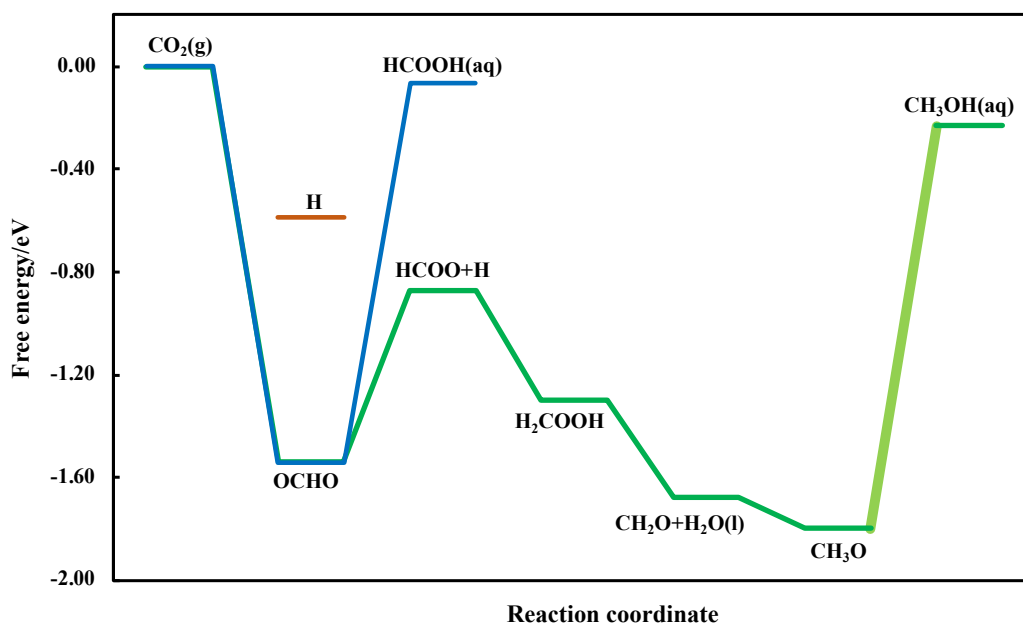

Figure S26. Free energy diagram for  $\text{HfO}_2$  for 75% CO coverage with br-CUS-CUS CO configuration. Different reaction pathways for formic acid and methanol products are presented. Potential limiting step is presented for methanol with light green line. COOH intermediate formation is absent and the reason to this is that its formation causes the third CO desorption from the surface.

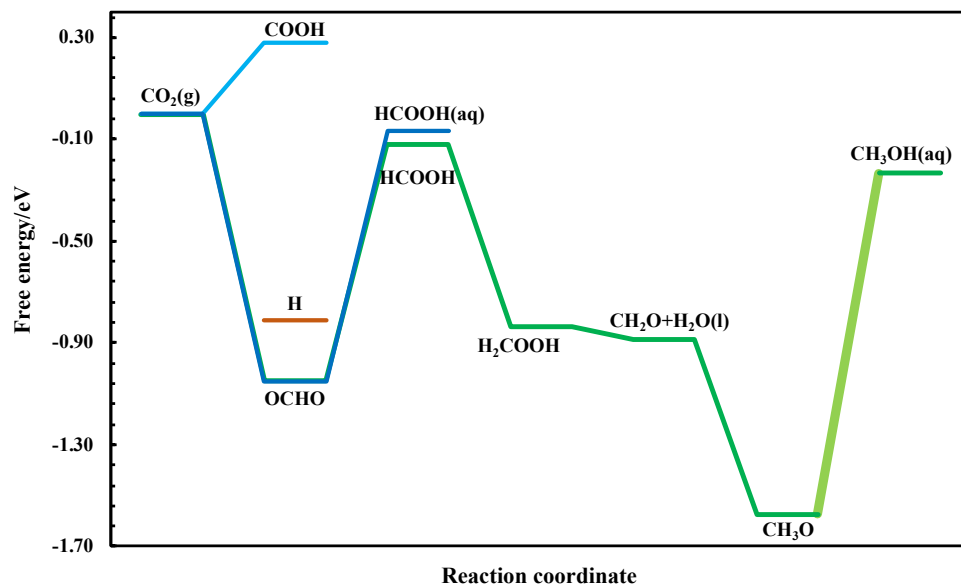

Figure S27. Free energy diagram for  $\text{NbO}_2$  for 75% CO coverage with br-CUS-CUS CO configuration. Different reaction pathways for formic acid and methanol products are presented. Potential limiting step is presented for methanol with light green line.

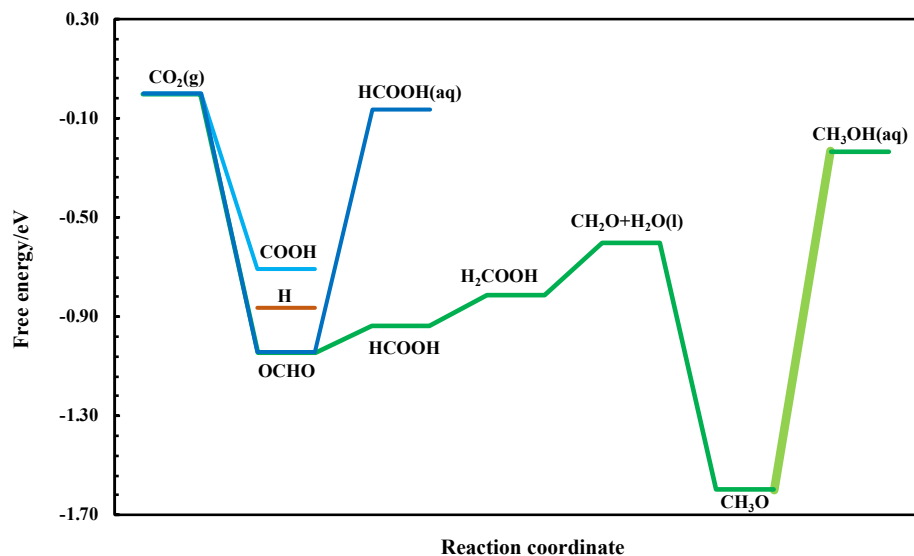

Figure S28. Free energy diagram for OsO<sub>2</sub> for 75% CO coverage with br-CUS-CUS CO configuration. Different reaction pathways for formic acid and methanol products are presented. Potential limiting step is presented for methanol with light green line.

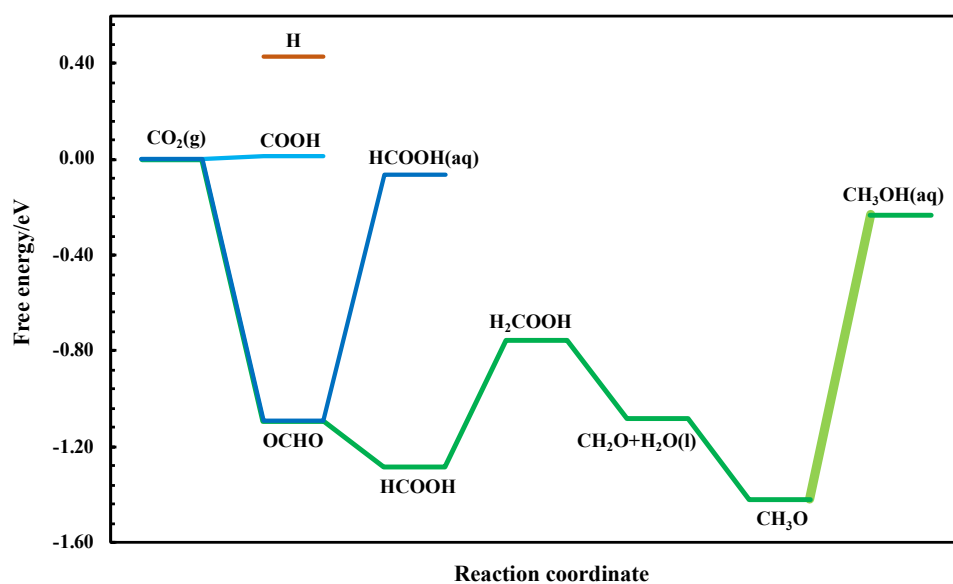

Figure S29. Free energy diagram for MoO<sub>2</sub> for 75% CO coverage with br-CUS-CUS CO configuration. Different reaction pathways for formic acid and methanol products are presented. Potential limiting step is presented for methanol with light green line.

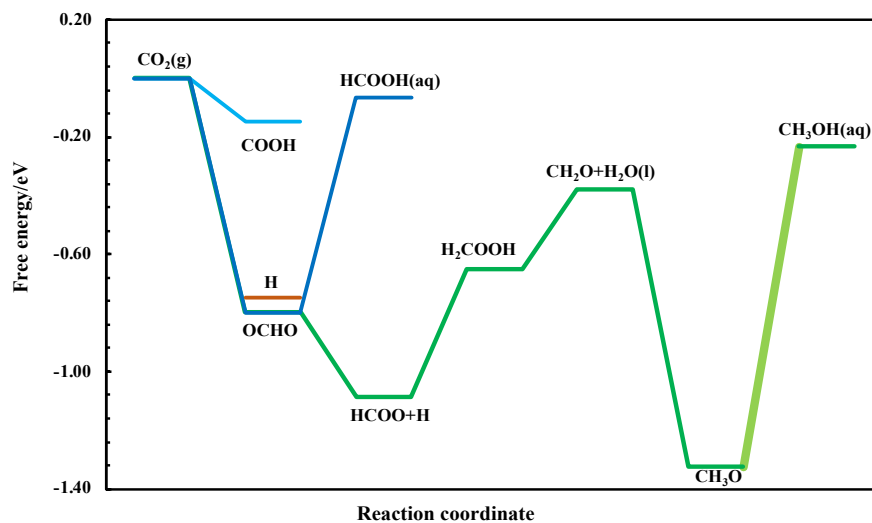

Figure S30. Free energy diagram for IrO<sub>2</sub> for 75% CO coverage with br-CUS-CUS CO configuration. Different reaction pathways for formic acid and methanol products are presented. Potential limiting step is presented for methanol with light green line.

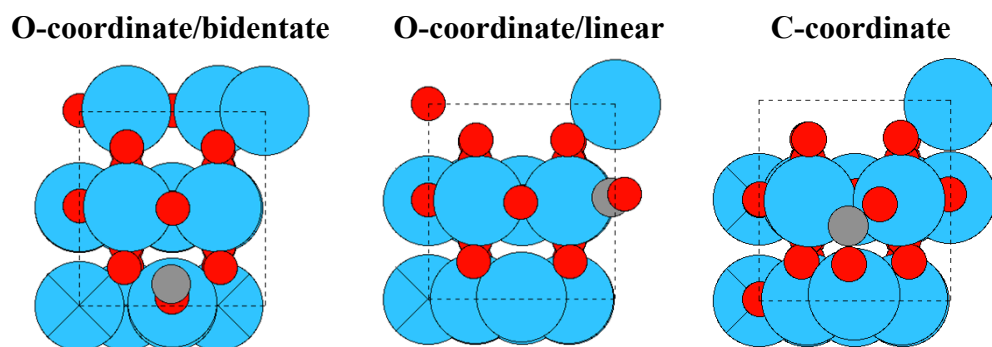

Figure S31. CO<sub>2</sub> adsorption on HfO<sub>2</sub> through a) O-coordinate and bidentate which is dissociated, b) O-coordinate and linear which is dissociated and c) C-coordinate which becomes flat on the surface.

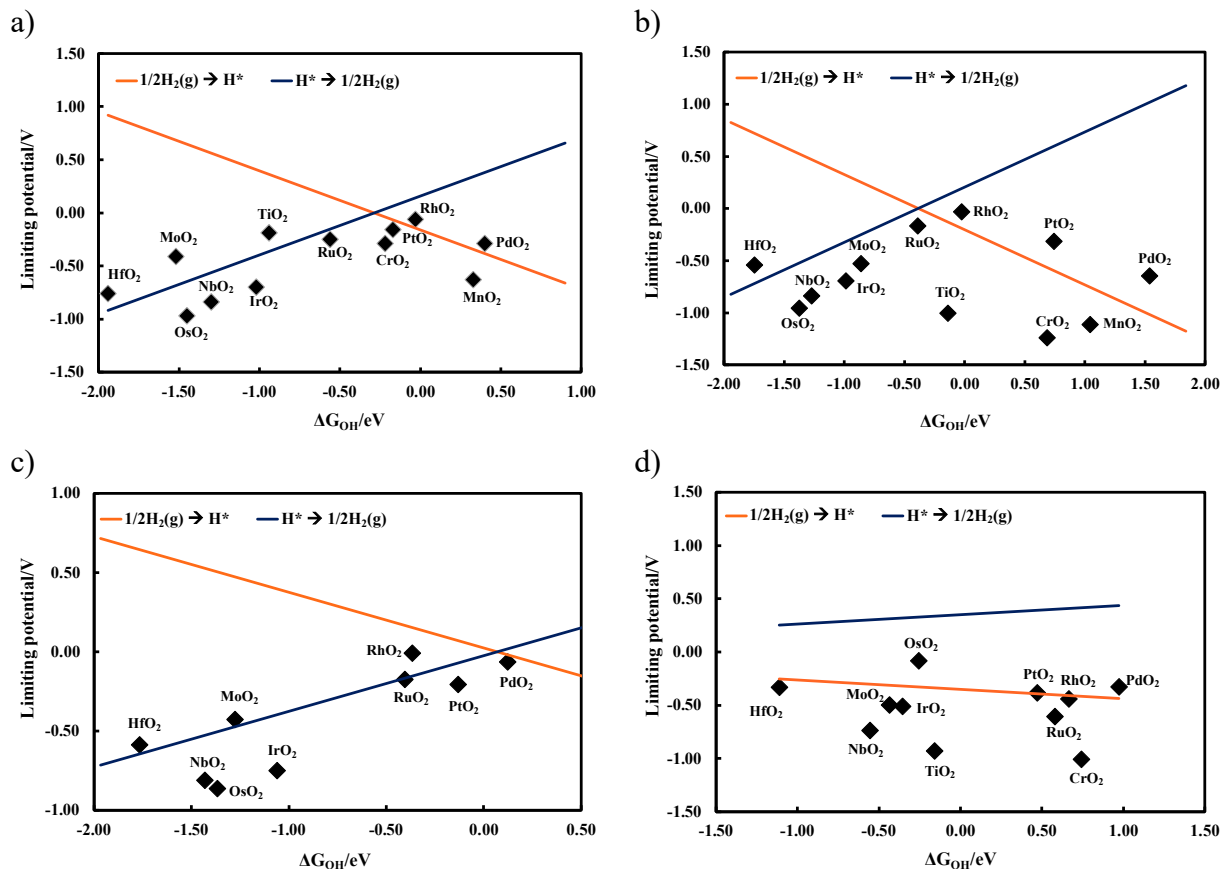

Figure S32. Theoretical volcanoes for HER for a) 25% CO coverage, b) 50% CO coverage and c) 75% CO coverage with br-CUS-CUS configuration and d) 75% CO coverage with br-br-CUS configuration. For each of the TMOs the explicit limiting potential values are included (diamond). Each line is for one electron-proton transfer step, indicated by different colors.

### Spin polarization calculations and the relevant tags and values used in the INCAR file for TMOs:

In order to perform spin polarized calculations, in the INCAR file the ISPIN tag should be 2 (ISPIN = 2) and a magnetic moment tag should be introduced as well (MAGMOM). The Magnetic moments are taken from the Materials Project INCAR files which is as follows.

#### HfO<sub>2</sub>:

MAGMOM = 16\*2 32\*0.6  
\*16:Hf, 32:O

#### MoO<sub>2</sub>:

MAGMOM = 16\*0.6 32\*0.6  
\*16:Mo, 32:O



**OsO<sub>2</sub>:**

$$\text{MAGMOM} = 16 * 0.32 * 0.6$$

\*16:Os, 32:O

**NbO<sub>2</sub>:**

$$\text{MAGMOM} = 5 \cdot 32 * 0.6$$

\*5, -5:Nb, 32:O

**TiO<sub>2</sub>:**

$$\text{MAGMOM} = 16 * 0.6 \cdot 32 * 0.6$$

\*16:Ti, 32:O

**IrO<sub>2</sub>:**

$$\text{MAGMOM} = 16 * 5 \cdot 32 * 0.6$$

\*16:Ir, 32:O

**RuO<sub>2</sub>:**

$$\text{MAGMOM} = 16 * 5 \cdot 32 * 0.6$$

\*16:Ru, 32:O

**CrO<sub>2</sub>:**

$$\text{MAGMOM} = 16 * 0.6 \cdot 32 * 0.6$$

\*16:Cr, 32:O

**PtO<sub>2</sub>:**

$$\text{MAGMOM} = 16 * 0.6 \cdot 32 * 0.6$$

\*16:Pt, 32:O

**RhO<sub>2</sub>:**

$$\text{MAGMOM} = 16 * 0.6 \cdot 32 * 0.6$$

\*16:Rh, 32:O

**MnO<sub>2</sub>:**

$$\text{MAGMOM} = 3 \cdot 32 * 0.6$$

\*3, -3:Mn, 32:O

**PdO<sub>2</sub>:**

MAGMOM = 16\*0.6 32\*0.6

\*16:Pd, 32:O
